1 **Role for a lytic polysaccharide monooxygenase in cell wall remodelling**

2

3 Xiaobo Zhong, Le Zhang, Gilles P. van Wezel, Erik Vijgenboom and Dennis Claessen\*

4

5

6

7 Molecular Biotechnology, Institute of Biology, Leiden University, P.O. Box 9505, 2300 RA

8 Leiden, The Netherlands

9

10 \* For correspondence: [D.Claessen@biology.leidenuniv.nl](mailto:D.Claessen@biology.leidenuniv.nl)

11

12

13

14 Key words: Cell wall biosynthesis, LPMO, peptidoglycan, apical growth, morphology, glycan,

15 cellulose

16 **ABSTRACT**

17 Peptidoglycan is a major constituent of the bacterial cell wall and an important determinant for  
18 providing protection to cells. Besides peptidoglycan (PG), many bacteria synthesize other  
19 glycans that become part of the cell wall. Streptomycetes grow apically, where they synthesize  
20 a glycan that is exposed at the outer surface, but how it gets there is unknown. Here we show  
21 that deposition of the apical glycan at the cell surface depends on two key enzymes, the  
22 endoglucanase CslZ and the lytic polysaccharide monooxygenase LpmP. Activity of these  
23 enzymes allows localized remodeling and degradation of the PG, and we propose that this  
24 facilitates passage of the glycan. The absence of both enzymes not only prevents  
25 morphological development, but also sensitizes strains to lysozyme. Given that lytic  
26 polysaccharide monooxygenases are commonly found in microbes, this newly identified  
27 biological role in cell-wall remodelling may be widespread.

28

29 **INTRODUCTION**

30 Bacteria are successful organisms that thrive in almost all environments. Part of their success  
31 is attributed to the presence of a cell wall that provides protection against environmental insults.  
32 A major component of the bacterial cell wall is peptidoglycan (PG), which is a layered mesh of  
33 glycan strands composed of alternating N-acetylglucosamine (GlcNAc) and N-acetylmuramic  
34 acid (MurNAc) moieties (1). These glycan strands are cross-linked via short peptide bridges,  
35 thereby creating a robust structure. In addition to PG, the cell wall often comprises other  
36 macromolecules including teichoic acids and capsular polysaccharides (CPs)(2, 3). Synthesis  
37 and assembly of all these components must be tightly regulated in space and time to ensure  
38 that the cell's integrity is not compromised.

39 Streptomycetes are Gram-positive bacteria with a complex multicellular lifestyle (4).  
40 They are producers of a wide variety of bioactive natural products, including over half of all  
41 clinical antibiotics (5, 6). Unlike unicellular bacteria, streptomycetes grow as long, branching  
42 filaments (called hyphae) that collectively form a mycelial network. Interestingly, their cell wall  
43 architecture is complex and multilayered (7). New cell wall material is incorporated exclusively  
44 at the hyphal tips, via a process known as polar growth (8, 9). Such tips also produce glycans  
45 other than PG, which are positioned exterior of the PG layer (7). The two-best studied glycans

46 are a  $\beta$ -(1-4)-glycan (also referred to as a cellulose-like glycan) and  
47 poly- $\beta$ -(1-6)-N-acetylglucosamine (PNAG) (10, 11). These glycans play pivotal roles in  
48 morphological development. For instance, streptomycetes form reproductive aerial hyphae  
49 when nutrients become scarce, but this process is blocked when the cellulose-like glycan is  
50 absent (12, 13). Likewise, the absence of either PNAG or the cellulose-like glycan prevents the  
51 formation of auto-aggregated biofilm-like structures (called pellets) in liquid-grown  
52 environments(13). So far, little is known how these glycans traverse the PG layer to become  
53 exposed at the cell surface.

54 The cellulose-like polymer was identified over a decade ago and found to be produced at  
55 hyphal tips by the cooperative action of a cellulose synthase-like protein CslA and the  
56 galactose oxidase GlxA (12-14). Transcription of *csIA* and *glxA* are coupled and inactivation of  
57 either gene abolishes deposition of the cellulose-like glycan at hyphal tips (14). The *csIA-glxA*  
58 operon is followed by the divergently transcribed *csIZ*, which encodes a putative  
59 endoglucanase (see Fig. 1). This gene organization is conserved in most streptomycetes,  
60 suggesting that CslZ's function perhaps relates to synthesis of the cellulose-like glycan (15).  
61 However, contrary to the absence of *csIA* or *glxA*, inactivation of *csIZ* in *Streptomyces lividans*  
62 had no clear effect on morphogenesis (13).

63 Upstream and in close proximity of *csIA-glxA-csIZ* lies a gene for a lytic polysaccharide  
64 monooxygenase (LPMO, SLI\_3182/LPMO10E (16)), but hereinafter referred to as *lpmP*.  
65 LPMOs are known to cleave polysaccharides through an oxidative mechanism and play a  
66 major role in carbon recycling in industry (17-19). Through random oxidation of polysaccharide  
67 substrates, LPMOs help to expose the well-organized microfibrils and increase their  
68 accessibility for other hydrolases. Consequently, these hydrolases can more efficiently  
69 degrade these polysaccharides (20-22). Notably, LPMO-encoding genes are ubiquitous in  
70 bacteria and fungi, although their biological roles have remained largely elusive. Only recently,  
71 LPMOs have been found to play roles in promoting *Pseudomonas aeruginosa* virulence (23),  
72 capturing copper in fungal meningitis (24) and degradation of lignin (25, 26).

73 In this study we demonstrate that the absence of both *lpmP* and *csIZ* prevents  
74 morphological development in *Streptomyces* and makes the mycelium more sensitive to  
75 lysozyme. These phenotypes coincide with the inability of the double mutant to deposit the

76 CslA-produced glycan at hyphal tips. Notably, this study shows that CslZ is a promiscuous  
77 hydrolase that can degrade PG in the presence of LpmP. Taken together, these results show  
78 that LpmP and CslZ are crucial players involved in cell-wall remodeling, by facilitating localized  
79 PG degradation to enable deposition of a protective cellulose-like glycan on the cell surface.  
80 Given that LPMOs are ubiquitous in microbes, we anticipate that these enzymes more  
81 generally play important roles in cell wall remodeling.

82

## 83 **RESULTS**

### 84 **Co-occurrence and clustering of genes involved in synthesis and degradation of** 85 **glycans**

86 It was previously shown that *csIA* is required for synthesis of a cellulose-like glycan that is  
87 exposed at the cell surface of hyphal tips (12, 27). In most *Streptomyces* species, *csIA* is  
88 located in a conserved gene cluster, harboring *csIA*, *glxA* and the divergently transcribed *csIZ*,  
89 with the latter encoding a putative glucanase (15) (Fig. 1A). CslZ is a lipoprotein (28) and  
90 BLAST analysis revealed that CslZ belongs to the glycoside hydrolase family 6 (GH6) proteins  
91 (accession number: WP\_011028610.1). GH6 hydrolases cleave  $\beta$ -(1-4)-glycosidic bonds in  
92 polymers such as cellulose, but also in other  $\beta$ -(1,4)-glycans such as xylan or chitin (29, 30)  
93 (Fig. 1B, Table 1). CslZ lacks carbohydrate-binding modules (CBM) that some other members  
94 of the GH6 hydrolases possess (Fig. S1). Notably, the active site region of CslZ (residues  
95 112-128) is strikingly similar to that of other GH6 family members and contains the key  
96 catalytic residue Asp120, which is proposed as the general catalytic acid in the inverting  
97 catalytic mechanism (31, 32) (Fig. 1C, S2). These *in silico* analyses identify CslZ as a member  
98 of the GH6 family of hydrolases active on  $\beta$ -(1-4)-glycans.

99 Three genes SCO2833-2835 are well conserved in streptomycetes and predominantly  
100 cluster with - and lie upstream of - *csIA-glxA-csIZ* (Fig. 1A). SCO2834 is a membrane protein  
101 that belongs to the so-called SPFH (stomatatin, prohibitin, flotillin and HflK/C) superfamily of  
102 proteins, which often associate with or form microdomains in membranes. SCO2835 is a  
103 putative membrane protein with a peptidoglycan-binding domain. LpmP (SCO2833) was  
104 shown to be a copper-dependent lytic polysaccharide monooxygenase (LPMO) active on chitin  
105 (16). Importantly, such LPMOs typically work in conjunction with hydrolytic enzymes to

106 degrade recalcitrant polysaccharides (19, 33).

107

### 108 **CslZ and LpmP are required for morphological development in *Streptomyces coelicolor***

109 To investigate the roles of CslZ and LpmP in morphogenesis, we first constructed a *csIZ* null  
110 mutant using plasmid p $\Delta$ *csIZ* (13). To do so, nucleotides +15 to +1011 relative to the  
111 translational start site of *csIZ* were replaced by an apramycin resistance marker. Furthermore,  
112 we inactivated *lpmP* using plasmid pXZ5 in the wild-type strain and in the *csIZ* single mutant,  
113 yielding a marker-less *lpmP* single mutant and an apramycin-resistant *csIZ/lpmP* double  
114 mutant (see Materials and Methods). Analysis of the *csIZ* and *lpmP* mutants in liquid media  
115 revealed that the morphology of the mycelial pellets was comparable to those of the wild-type  
116 strain (Fig. 2A). However, a constructed double mutant lacking *lpmP* and *csIZ* was no longer  
117 able to form pellets and was phenotypically similar to the *csIA* mutant (Fig. 2A). We also  
118 constructed strains that expressed *csIZ*, *lpmP* or both genes from the constitutive *gapAp*  
119 promoter (34) (Fig. 2A). Complete opposite of the strain lacking both *csIZ* and *lpmP*, the strains  
120 constitutively expressing these genes formed pellets that were even denser than those of the  
121 wild-type strain after 48 hours (Fig. 2A).

122 Next, we investigated growth of all mutant strains on R5 agar plates, under which  
123 conditions the *csIA* mutant failed to enter development (12, 14). Likewise, deletion mutants  
124 lacking both *lpmP* and *csIZ* failed to produce aerial hyphae and spores, while morphological  
125 differentiation was unaffected in the single mutants (Fig. 2B). Notably, colonies of the  
126 *csIZ/lpmP* double mutant were considerably smaller than those of the parent or the *csIA*, *csIZ*  
127 or *lpmP* mutants (Fig. 2B). These results show that CslZ and LpmP together are required for  
128 normal growth and development of *Streptomyces*, and that in the absence of both proteins a  
129 synthetic phenotype becomes evident that is similar to the absence of CslA.

130

### 131 **Glycan deposition at hyphal tips depends on CslA, CslZ and LpmP is important for** 132 **protection against lysozyme**

133 The non-pelleting phenotype of the *csIZ/lpmP* double mutant prompted us to investigate  
134 whether the glycan produced by CslA was still detectable at hyphal tips. To this end, we  
135 stained mycelium with calcofluor white, which binds to  $\beta$ -(1-4) glycans (12). Contrary to the

136 wild-type strain, hyphal tips of the *csIZ/lpmP* double mutant did no longer stain, a phenotype  
137 shared with the *csIA* mutant (Fig. 3). Importantly, tip-staining was strongly reduced in the single  
138 *csIZ* or *lpmP* mutants (Fig. 3 and S3), indicating that CslZ and LpmP have direct roles in  
139 deposition of the glycan produced by CslA. Interestingly, when CslZ or LpmP were expressed  
140 from the constitutive *gapAp* promoter, tip staining was more pronounced compared to all other  
141 strains (Fig. 3 and S3). In fact, apical staining was most pronounced when both genes were  
142 expressed under control of the *gapAp* promoter (Fig. 3, S3). Altogether, these results show  
143 that CslZ and LpmP together are essential for glycan deposition at hyphal tips.

144 Previous studies revealed that the CslA-produced glycan is located exterior to the PG  
145 layer, presumably providing protection during tip growth (7, 12, 35). To test this hypothesis, we  
146 exposed strains to a variety of cell wall-targeting agents. When the strains were grown in the  
147 presence of penicillin or ampicillin (acting on the synthesis of PG), no major differences in  
148 growth inhibition were observed between the wild-type strain and its mutants (Fig. S4).  
149 However, exposure to 0.25 mg ml<sup>-1</sup> lysozyme (acting on intact PG) revealed dramatically  
150 reduced viability of the *csIA* and *csIZ/lpmP* double mutant as compared to the wild-type strain  
151 and its single mutants or with the genes behind the constitutive *gapAp* promoter (Fig. 4). While  
152 approximately 15% of the wild-type spores survived lysozyme treatment, no colonies appeared  
153 when spores of the *csIA* and *csIZ/lpmP* mutants were plated (Fig. 4). These results show that  
154 presence of the cellulose-like glycan, even at reduced levels, confers resistance to lysozyme  
155 and are consistent with the glycan being positioned exterior to the PG layer on the hyphal  
156 surface.

157

### 158 **LpmP binds to PG and facilitates PG hydrolysis by CslZ**

159 All results indicated that CslZ and LpmP have partially overlapping roles in deposition of the  
160 cellulose-like glycan produced by CslA at the cell surface. To further study their precise roles,  
161 we first produced CslZ and LpmP in *E. coli* (Fig. 5A). The purified proteins were then tested for  
162 their ability to bind and hydrolyze a range of  $\beta$ -(1-4) glycans, including PG (from *Bacillus*  
163 *subtilis*), cellulose and  $\alpha$ -chitin. CslZ did not bind to any of the substrates, in agreement with  
164 the absence of canonical carbohydrate-binding modules (see Fig. 5B, Fig. S1). However, CslZ  
165 hydrolyzed various forms of cellulose and  $\alpha$ -chitin (Fig. 5C), showing that firm binding to these

166 polymers is not a prerequisite for hydrolysis. Interestingly, unlike CslZ, LpmP bound strongly to  
167 PG and could be detached from PG using 4% SDS (Fig. 5B). Furthermore, LpmP could also  
168 bind to  $\beta$ -chitin albeit with a lower affinity than to PG (Fig. 5B).

169 To see if the binding of LpmP to PG was functionally relevant, we also measured the  
170 ability of LpmP to facilitate PG hydrolysis, quantified by the release of the dye Remazol Brilliant  
171 Blue (RBB) from RBB-PG (see Materials and Methods). Neither CslZ nor LpmP were  
172 individually able to degrade PG, contrary to commercial lysozyme (Fig. 5D). However, when  
173 CslZ and LpmP were mixed, PG degradation was observed at a similar level as observed for  
174 lysozyme (Fig. 5D). Furthermore, the addition of LpmP to lysozyme strongly increased the  
175 amount of RBB released from RBB-PG, consistent with a role for LPMOs in degrading  
176 recalcitrant polymers such as peptidoglycan. As a control, we also tested if LpmP in its apo  
177 form (i.e. without the required cofactor copper) could facilitate the PG hydrolytic activity of CslZ  
178 and lysozyme. As expected for a copper-dependent enzyme, apo-LpmP did not facilitate the  
179 degradation of RBB-PG by lysozyme or CslZ (Fig. S5). Taken together, these results  
180 demonstrate that CslZ is a promiscuous hydrolase that in the presence of LpmP can degrade  
181 PG.

182

## 183 **DISCUSSION**

184 Bacterial LPMOs have been implicated in a variety of functions, including virulence, nutrition  
185 and symbiosis (36). LPMOs exert these roles by cleaving recalcitrant polysaccharides via an  
186 oxidative mechanism. In this paper we identify for the first time an LPMO that facilitates  
187 degradation of peptidoglycan. This degradation is required to expose a surface-located  
188 cellulose-like glycan, which plays pivotal roles in morphogenesis in *Streptomyces*. Given that  
189 LPMOs are commonly found in microbes, we anticipate that this newly identified biological role  
190 in cell wall remodelling is widespread.

191 Since the first report of LPMOs, these proteins have shown great potential in industrial  
192 applications with their ability to cleave polysaccharides by an oxidative mechanism(37).  
193 LPMOs perform this cleaving activity randomly in the glycan chain, thereby creating better  
194 access for more specific hydrolases to further degrade the polysaccharide. In biological  
195 systems, the proposed roles for LPMOs are also predominantly associated with their ability to

196 decompose polysaccharides, which are a food source for various microorganisms (38).  
197 Bacterial LPMOs have also been shown to mediate binding to chitin, which is present in the  
198 fungal cell wall or in the gut of insects. Firm binding to chitin may promote adhesion of the  
199 LPMO-producing bacterium to these hosts, sometimes even leading to pathogenicity (39).  
200 Recent work demonstrated that LPMOs can also be virulence factors. Deletion of an LPMO in  
201 *Pseudomonas aeruginosa* attenuated virulence, as did the deletion of an LPMO from *Listeria*  
202 *monocytogenes* (23, 40). In all cases, the involved LPMOs exert their function on molecules  
203 present in the environment of the LPMO-producer, which is in line with the fact that these  
204 proteins are secreted. Prolific producers of LPMOs are streptomycetes, which often possess  
205 multiple LPMO-encoding genes (41-43). In fact, the best-studied representative of this group  
206 of bacteria, *S. coelicolor*, has 7 copies (44). It is assumed that this relatively large number is  
207 explained by the fact that these organisms thrive in environments that are rich in a variety of  
208 recalcitrant polysaccharides. Although this is certainly true, we here found that one of these  
209 LPMOs has an important role in morphological development of the producer itself. More  
210 specifically LpmP was found to bind strongly to peptidoglycan, facilitating its degradation  
211 together with the hydrolase CslZ. Based on our results we propose the following model. LpmP  
212 likely creates individual cuts in PG, which then becomes a substrate for further degradation by  
213 CslZ. In this manner, the combined activity of both proteins results in a localized PG  
214 degradation that is important to expose/display the cellulose-like glycan on the hyphal surface.  
215 During glycan synthesis by CslA the nascent glycan chain is modified by the galactose  
216 oxidase-like enzyme GlxA before its deposition on the outside of the cell wall (Fig. 6).  
217 Previous work indicated that this apically localized glycan plays important roles in  
218 morphogenesis (11, 12). For instance, it is essential for the formation of reproductive aerial  
219 hyphae on solid media, indicating that without this glycan the colony is effectively sterile.  
220 Furthermore, it is also required for the formation of pellets in liquid-grown environments (13,  
221 14). We here also find that the cellulose-like polymer provides protection against lysozyme.  
222 Notably, like the *csIA* mutant, the *lpmP/cslZ* double mutant was unable to grow in the presence  
223 of lysozyme. This demonstrates that this polymer can serve a protective role at growing hyphal  
224 tips, as suggested earlier (12, 45). Given that cell wall synthesis and remodelling occur at  
225 these sites, hyphal tips are relatively vulnerable in comparison to the more subapical regions



226 that contain inert PG. Notably, deletion of either *csIZ* or *lpmP* had no significant effect on  
227 lysozyme sensitivity (see Fig. 4). Apparently, the presence of a little amount of the glycan,  
228 which is detectable in either mutant, is already sufficient to provide protection against  
229 lysozyme.

230       Synthesis of the cellulose-like polymer is performed by CslA in collaboration with several  
231 other proteins (13). *csIA* is part of an operon that also accommodates *glxA* and *csIZ*, and which  
232 is found in almost all streptomycetes. Both CslA and GlxA are essential for formation of the  
233 functional polymer, whereby GlxA possibly modifies the nascent glycan. GlxA requires copper  
234 for its maturation, which is provided by the copper chaperone Sco (13). Indeed, the absence of  
235 this chaperone also blocks morphogenesis. Like GlxA, also LpmP is a copper-dependent  
236 enzyme. How LpmP acquires its copper is unknown, but this could also require Sco. Following  
237 synthesis of the glycan by CslA/GlxA, the polymer needs to traverse the thick PG layer. Based  
238 on our data, we propose that localized PG hydrolysis by LpmP and the promiscuous hydrolase  
239 CslZ is necessary and sufficient to create a channel through the PG layer to ensure that the  
240 glycan produced by CslA becomes localized exterior of the PG (Fig. 6). This is consistent with  
241 the observation that the polymer produced by CslA, was absent from hyphal tips in strains  
242 lacking both *lpmP* and *csIZ*. We expect that PG hydrolysis is confined to regions in proximity of  
243 the sites where CslZ and LpmP are secreted. As a lipoprotein, CslZ is tightly associated with  
244 the membrane limiting its ability to diffuse. In contrast, LpmP can theoretically freely diffuse in  
245 the cell wall matrix. However, movement is likely limited due to the strong binding ability of  
246 LpmP to PG. We therefore expect that LpmP and CslZ will mainly act close to their secretion  
247 sites. In this manner the cell can retain its integrity, even in strains producing large quantities of  
248 these proteins.

249       So how are the seemingly wild-type phenotypes of the single mutants explained? We  
250 propose that the activities of LpmP and CslZ can be substituted for to some extent by other  
251 related enzymes. For instance, *S. coelicolor* has 7 LPMOs, some of which may substitute for  
252 the absence of LpmP. In this context it's interesting to highlight SCO1734, which has a sortase  
253 recognition site that leads to covalent coupling of this protein to PG (46). Indeed, this protein  
254 has been localized to the cell wall *in vivo* (Vidiadakis & Vijgenboom, unpublished results). This  
255 could perhaps indicate that SCO1734 is also involved in PG remodelling. Furthermore, *S.*

256 *coelicolor* produces many glucanases, one of which could be a candidate to compensate for  
257 the loss of CslZ. However, such a substituting protein may lack the ability to interact with other  
258 proteins involved in remodelling of the cell wall, an aspect that may be envisaged for optimal  
259 performance. Indeed, preliminary two hybrid analyses support the existence of such a  
260 multiprotein complex involved in synthesis and remodelling of the glycan produced by CslA  
261 (manuscript in preparation).

262 Biosynthesis of cellulose has been best studied in the Gram-negative bacterium *E. coli*  
263 where cellulose is produced by the BcsA/BcsB complex. Extrusion of the cellulose microfibrils  
264 in the environment is mediated by the conserved BcsC protein, which binds to peptidoglycan,  
265 while also forming an exit pore through the outer membrane (47). However, how cellulose is  
266 crossing the peptidoglycan layer is not described for any of the well-studied cellulose systems.  
267 Perhaps crossing of the PG layer in Gram-negative bacteria is possible without specific  
268 hydrolases given that that the PG layer is relatively thin in these organisms. Like in  
269 *Streptomyces*, an endoglucanase, called BcsZ, is present in the cellulose biosynthesis gene  
270 cluster, which localizes in the periplasmic space. The precise role is unclear and contrasting  
271 reports have emerged about its role (48, 49). It is tempting to speculate that also in *E. coli* the  
272 role of BcsZ is related to ensuring that the glycan can pass through the PG layer, thus  
273 preventing accumulation of cellulose in the periplasm.

274 In conclusion, our work identifies a set of proteins that are the likely candidates to facilitate  
275 traversing of the cellulose-like glycan through the thick PG layer. The involvement of an LPMO  
276 associates this class of proteins with PG remodelling, which is an important step in any  
277 growing bacterial cell. We therefore believe that this work will open important new avenues to  
278 further understand PG remodelling, while also providing new opportunities for drug discovery  
279 aimed at identifying molecules that interfere with this process.

280

281

## 282 MATERIALS AND METHODS

### 283 Bacterial strains and culture conditions

284 All strains used in this study are listed in Table S1. Mannitol Soy flour (MS) agar plates were  
285 used for collection of spores and for conjugation experiments, while phenotypic analyses were  
286 performed on solid R5 medium (50). To study the morphology in liquid environments, freshly  
287 prepared *Streptomyces* spores were inoculated in 100 ml TSBS medium in 250 ml unbaffled  
288 Erlenmeyer flasks equipped with metal coils at a final concentration of  $10^6$  CFUs ml<sup>-1</sup>. Flasks  
289 were grown at 30 °C while shaking at 200 rpm min<sup>-1</sup>.

290 *E. coli* strains DH5 $\alpha$  and BL21(DE3) were used for routine cloning purposes and for  
291 expression of proteins, respectively. *E. coli* ET12567 harboring pUZ8002 was used to obtain  
292 unmethylated plasmid DNA and for conjugation of plasmids to *Streptomyces* (51). All *E. coli*  
293 strains were grown at 37 °C in LB medium supplemented with the appropriate antibiotics, if  
294 necessary.

295

### 296 Construction of plasmids and strains

297 For expression of CslZ in *E. coli*, genomic DNA of *S. coelicolor* was used as the template to  
298 amplify nucleotides 97-999 of the coding region of *csIZ* (also called SCO2838) using primers  
299 *csIZ*-F and *csIZ*-R (see Table S3 for all primers used in this study), in which the original signal  
300 peptide (1-96 nucleotides) was removed. The amplified sequence was cloned as an  
301 NcoI-HindIII fragment into pET28a (Novagen), yielding pXZ1. This plasmid was introduced into  
302 *E. coli* BL21 (DE3) by transformation (52). The plasmid, pET26b-LPMO, used to express  
303 LpmP in *E. coli* BL21(DE3) was a gift from Dr. Jonathan A. R. Worrall (University of Essex).

304 To constitutively express CslZ in *S. coelicolor*, the *gapAp* promoter of SCO1947 and  
305 coding sequence of *csIZ* were amplified from genomic DNA of *S. coelicolor* using primers  
306 *gapA*-F(BamHI)/*gapA*-R and 2838-F/2838-R, respectively. The amplified products were then  
307 cut with the restriction enzymes BamHI-NdeI (*gapAp*) and NdeI-EcoRI (*csIZ*), after which the  
308 digested fragments were ligated together in pSET152 (53) that had been cut with BamHI and  
309 EcoRI, yielding pXZ2. For constitutive expression of LpmP in *Streptomyces*, the *gapAp*  
310 promoter and coding sequence of SCO2833 were amplified from genomic DNA of *S. coelicolor*  
311 using primers *gapA*-F(XbaI)/*gapA*-R and 2833-F/2833-R, respectively. The amplified products

312 were then cut using the restriction enzymes XbaI-NdeI (*gapAp*) and NdeI-BamHI (SCO2833)  
313 and ligated into pSET152 that had been digested with XbaI and BamHI, yielding pXZ3.

314 The construct used to overexpress both CslZ and LpmP, termed pXZ4, was generated by  
315 isolating the *gapAp-cslZ* fragment from pXZ2 using BamHI and EcoRI and inserting this  
316 fragment into pXZ3 plasmid digested with the same enzymes. The three constructs were  
317 subsequently introduced in *S. coelicolor* M145 via conjugation (51). The *cslZ* null mutant in *S.*  
318 *coelicolor* was constructed using plasmid p $\Delta$ cslZ as described (13). Inactivation of the *lpmP*  
319 gene was achieved by creating a stop codon at nucleotide position 406 through the  
320 single-nucleotide-resolution genome editing system pCRISPR-cBEST (54). Briefly, a fragment  
321 was amplified from the pCRISPR-cBEST plasmid with primers CBest-spacer-F and CBest-R,  
322 thereby introducing the *lpmP*-targeting spacer. This PCR product was then cloned into  
323 pCRISPR-cBEST via NcoI and SnaBI to generate plasmid pXZ5. After conjugation, individual  
324 exconjugants were randomly picked and streaked on MS agar plates supplemented with 20  $\mu$ g  
325 ml<sup>-1</sup> thiostrepton. Colonies were then streaked again on MS plates without any antibiotics after  
326 which single colonies were picked and inoculated in 2 ml TSBS medium. After 3 days, genomic  
327 DNA was isolated and the coding sequence of SCO2833 was PCR-amplified using primers  
328 2833-F/2833-R, followed by sequencing of the PCR product. The spacer used to create the  
329 mutation was generated using CRISPY-web (55) and is listed in Table S3. All mutants were  
330 verified by sequencing.

331

### 332 **Bioinformatic analysis**

333 To investigate the glycoside hydrolase (GH) family that CslZ belongs to, BLASTP  
334 (<http://blast.ncbi.nlm.nih.gov>) was used (56). The Carbohydrate-Active Enzymes database  
335 (CAZy) was used to investigate similarities of CslZ to known members of the GH6 family (29).  
336 Representative GH6 proteins were selected and included *Thermobifida fusca* Cel6A (*TfCel6A*),  
337 *Thermobifida fusca* Cel6B (*TfCel6B*), *Teredinibacter turnerae* CelAB, and Cel6H from an  
338 uncultured bacterium. GH6 domains contained in these proteins were predicted by InterPro  
339 (<https://www.ebi.ac.uk/interpro/>), and alignments of these domains was performed using  
340 Cluster Omega (<https://www.ebi.ac.uk/Tools/msa/clustalo/>). The phylogenetic analysis of CslZ  
341 was done with Phylogeny.fr (57) using a collection of eleven hydrolases belonging to the GH6

342 family, including XpCel6A (58), CelAB (59), CbhA (60), XylK2 (61), CbhII (62), TfCel6B (63),  
343 CenA (64), EGI (65), TfCel6A (66), McenA (67) and TbCel6A (68). This selection of GH6  
344 hydrolases was made on the availability of experimental data on their substrates.

345

#### 346 **Microscopy**

347 Pellets were imaged using a Zeiss Axiomicroscope equipped with an Axiocam 105 camera as  
348 described previously (34).  $\beta$ -(1-4) glycans were stained with calcofluor white (Sigma) as  
349 described (10, 12). Stack acquisition was done on a Zeiss LSM900 Airyscan 2 microscope. All  
350 fluorescent images were imaged with the same setting (Laser Intensity: 3.5%, Pinhole: 47 $\mu$ m,  
351 Master Gain: 750V, Digital Offset: -15 and Digital Gain: 1.0). For quantitatively comparing  
352 fluorescence, the measure region with the size of 15  $\mu$ m x 15  $\mu$ m squares at hyphal tips was  
353 used. Fluorescence was measured using ImageJ software (version 2.0.0/1.53c/Java  
354 1.8.0\_172/64-bit) (69).

355

#### 356 **Lysozyme and antibiotic sensitivity assays**

357 Lysozyme sensitivity assays were performed by plating approximately 1000 spores of each  
358 strain on Difco nutrient agar plates either or not supplemented with 0.25 mg ml<sup>-1</sup> lysozyme  
359 (from chicken egg white,  $\geq$ 40,000 units mg<sup>-1</sup>, Sigma). After 48 h of growth, the total number of  
360 colonies was counted. For every strain, the number of colonies on the plate with lysozyme was  
361 divided by the number of colonies on the plate without lysozyme as an estimate for lysozyme  
362 sensitivity.

363 Antibiotic sensitivity assays were performed with discs diffusion assays using 50  $\mu$ g ml<sup>-1</sup>  
364 ampicillin, 50  $\mu$ g ml<sup>-1</sup> penicillin G, or 25  $\mu$ g ml<sup>-1</sup> vancomycin.

365

#### 366 **Expression and purification of CslZ and LpmP**

367 The LpmP protein was produced in BL21(DE3) and purified as described (16), except that the  
368 purified protein was stored in buffer C containing 25 mM Tris-HCl and 200 mM NaCl (pH 7.5).

369 To purify CslZ, *E. coli* cells harboring plasmid pXZ1 (Table S2) were cultured at 37 °C to  
370 an OD<sub>600</sub> of 0.6 in LB medium containing 50  $\mu$ g ml<sup>-1</sup> kanamycin. Then, expression was induced  
371 by adding 1 mM isopropyl  $\beta$ -D-1-thiogalactopyranoside and cells were grown at 20 °C for 18 h.

372 The induced cells were lysed by sonication in binding buffer (25 mM Tris-HCl, 200 mM NaCl,  
373 pH 7.5) and after centrifugating the lysate was loaded on a Co<sup>2+</sup>-chelating column equilibrated  
374 with binding buffer. 10 column volumes of binding buffer and 10 ml of elution buffer (25 mM  
375 Tris-HCl, 200 mM NaCl, 10 mM imidazole, pH 7.5) were used to wash and elute CslZ,  
376 respectively. The protein was finally purified by gel filtration using a Superdex 200 Increase  
377 10/300 GL column (GE Healthcare) equilibrated with binding buffer. Sample fractions were  
378 analyzed by SDS-PAGE. If necessary, fractions were concentrated to 5 mg ml<sup>-1</sup> with the 10  
379 kDa molecular weight cut-off concentrator (Millipore).

380

### 381 **Preparation of Cu-loaded LpmP**

382 To load copper on LpmP, copper (II) sulfate (Sigma) was added to reach a 2 x mole equivalent  
383 of purified LpmP. After incubation for 15 min at room temperature, the excess copper was  
384 removed by applying the protein samples to a Superdex 200 Increase 10/300 GL column  
385 equilibrated with buffer 25 mM Tris-HCl, pH 7.5. After collection, fractions were concentrated as  
386 described above.

387

### 388 **Substrate binding assay**

389 Binding of LpmP and CslZ to different polymers was essentially performed as described (16,  
390 70), with the following modifications. Briefly, 50 µg of purified Cu-LpmP or CslZ protein were  
391 incubated for 3 h at room temperature with 0.2% peptidoglycan (PG) from *Bacillus subtilis*  
392 (Sigma), 5 mg α-chitin from shrimp shells (Sigma) or 5 mg microcrystalline cellulose (Sigma) in  
393 100 µl 25 mM Tris-HCl buffer (pH 7.5). The supernatant was then separated from the polymers  
394 by centrifugation for 20 min at 14,000 g and kept as the fraction containing unbound protein.  
395 The polymers were then washed two times with wash buffer (25 mM Tris-HCl, pH 7.5) to  
396 remove weakly bound proteins. Strongly bound proteins were extracted from the polymers by  
397 adding 4% SDS solution and incubating the samples for 1 h at room temperature. Samples  
398 were then analyzed with SDS-PAGE using a 15% gel.

399

### 400 **Preparation of Remazol Brilliant Blue-labelled PG**

401 Peptidoglycan (PG) was labelled with Remazol Brilliant Blue (RBB) (Sigma) as described

402 previously (70, 71). Briefly, 1 mg PG (from *Bacillus subtilis*, Sigma) was resuspended in 200  $\mu$ l  
403 0.25 M NaOH containing 25 mM RBB and incubated overnight at 37°C. After neutralizing with  
404 1 M HCl, RBB-labelled PG was pelleted by centrifugation for 20 min at room temperature and  
405 washed three times with 1 ml of Milli-Q water. Finally, the RBB-labelled PG pellet was  
406 resuspended in 100  $\mu$ l Milli-Q water and stored at 4°C until further use.

407

#### 408 **Quantitative and qualitative assessment of hydrolytic activity**

409 The quantitative analysis of the hydrolytic activity of CslZ were essentially performed as  
410 described (72) with the following modification. Reactions were carried out in 20 mM Tris buffer  
411 (pH 7.5) supplemented with 4 mg ml<sup>-1</sup> CMC sodium salt (Sigma), 8 mg ml<sup>-1</sup> microcrystalline  
412 cellulose (Sigma), 8 mg ml<sup>-1</sup> Avicel® PH-101 (Sigma) or 8 mg ml<sup>-1</sup>  $\alpha$ -Chitin (from shrimp shells,  
413 Sigma). For each reaction, 20  $\mu$ g CslZ was used and the mixtures were incubated at 37 °C  
414 while shaking at 250 rpm min<sup>-1</sup>. As a control, a commercial lysozyme (from chicken egg white,  
415  $\geq$ 40,000 units/mg, Sigma), cellulase (from *Aspergillus niger*,  $\geq$ 0.3 units/mg, Sigma) and  
416 chitinase (from *Streptomyces griseus*,  $\geq$ 200 units/mg, Sigma) were used. After incubation for  
417 72h, the reaction mixture was centrifuged, and the reducing sugars in the supernatant were  
418 detected using the 3,5-dinitrosalicylic acid (DNSA) reagent in a microtiter plate reader (39). All  
419 measurements are the average of three replicates.

420 The activity of LpmP on carboxymethyl cellulose (CMC) and  $\alpha$ -chitin was evaluated using  
421 plate assays. Agar plates containing polysaccharides were prepared by dissolving 0.5% CMC  
422 (Sigma) or 0.5%  $\alpha$ -chitin (Sigma) in Milli-Q water and then solidified with 2%  
423 autoclave-sterilized LB-agar. 100  $\mu$ g ml<sup>-1</sup> ampicillin was added to the solutions to avoid  
424 contamination. To assess the hydrolytic activity, 40  $\mu$ M of the commercial hydrolases (cellulase,  
425 chitinase), 40  $\mu$ M purified CslZ, 5  $\mu$ M Cu-LpmP, or mixtures thereof were spotted as 10  $\mu$ l  
426 droplets onto the polysaccharide-containing plates, supplemented with 1 mM ascorbic acid.  
427 After spotting, plates were incubated at 37 °C for 24 h, followed by staining of the plates with a  
428 0.1% Congo Red solution for 1 h at room temperature. Prior to imaging, plates were destained  
429 with 1 M NaCl for 2 h to visualize clearing zones. Imaging of plates was done using an Epson  
430 Perfection V37 scanner and captured images were converted to greyscale by ImageJ.

431 Quantitative assessment of LpmP and CslZ activity on PG was performed using an

432 RBB-labelled PG degradation assay (71). 5  $\mu$ M lysozyme (Sigma), 5  $\mu$ M purified CslZ, 1  $\mu$ M  
433 Cu-LpmP or mixtures thereof were incubated with 10  $\mu$ l RBB-labelled PG in 100  $\mu$ l reaction  
434 buffer (25 mM Tris-HCl, 100 mM NaCl, 1 mM ascorbic acid, pH 7.5) for 3 h at 37°C while  
435 shaking. Then, reactions were quenched by heating for 10 minutes at 95°C and undegraded  
436 RBB-PG was removed by centrifugation at 21,000 g for 10 minutes at room temperature. RBB  
437 released in the supernatant was quantified by measuring the absorbance at 595 nm. All  
438 reactions were performed in triplicate.  
439



440 **TABLES**

441

442 **Table 1. Hydrolases belonging to the GH6 family including their substrates**

443

| <b>Hydrolase</b> | <b>Organism</b>                            | <b>Substrate(s)</b>     | <b>Reference</b> |
|------------------|--------------------------------------------|-------------------------|------------------|
| CsIZ             | <i>Streptomyces coelicolor</i>             | Unknown                 | This study       |
| XpCel6A          | <i>Xylanimicrobium pachnodae</i> DSM 12657 | Cellulose               | (58)             |
| CelAB            | <i>Teredinibacter turnerae</i>             | Cellulose, chitin       | (59)             |
| CbhA             | <i>Cellulomonas fimi</i> ATCC 484          | Cellulose               | (60)             |
| XylK2            | <i>Cellulosimicrobium</i> sp. HY-13        | Xylan                   | (61)             |
| CbhII            | <i>Streptomyces</i> sp. M23                | Cellulose               | (62)             |
| TfCel6B          | <i>Thermobifida fusca</i>                  | Cellulose               | (63)             |
| CenA             | <i>Cellulomonas fimi</i> ATCC 484          | Cellulose               | (64)             |
| EGI              | <i>Neisseria sicca</i> SB                  | Cellulose acetate       | (65)             |
| TfCel6A          | <i>Thermobifida fusca</i>                  | Cellulose               | (66)             |
| MCenA            | <i>Micromonospora cellulolyticum</i>       | Carboxymethyl cellulose | (67)             |
| TbCelA           | <i>Thermobispora bispora</i>               | Cellobiose              | (68)             |

444 **FIGURE LEGENDS**

445 **Figure 1. Comparative analysis of glycoside hydrolase family 6 proteins. (A)**

446 MultiGeneBlast (73) output showing gene clusters of filamentous actinobacteria, which are  
447 homologous to the *csIA-glxA-csIZ* gene cluster of *S. coelicolor* involved in synthesis of a  
448 cellulose-like polymer. Clusters have a minimal identity of 30% and minimal sequence  
449 coverage of 25% to the *S. coelicolor* gene cluster. **(B)** Phylogenetic tree of members of the  
450 GH6 family including CslZ (*S. coelicolor*), XpCel6A (*Xylanimicrobium pachnodae*), CelAB  
451 (*Teredinibacter turnerae* T7901), CbhA (*Cellulomonas fimi* ATCC 484), XylK2  
452 (*Cellulosimicrobium* sp. HY-13), CbhII (*Streptomyces* sp. M23), TfCel6B (*Thermobifida fusca*  
453 YX), CenA (*Mycobacterium tuberculosis* H37Rv), EGI (*Neisseria sicca* SB), TfCel6A  
454 (*Thermobifida fusca* YX), McenA (*Micromonospora cellulolyticum*) and TbCel6A  
455 (*Thermobispora bispora*), which were selected based on the availability of experimental data  
456 on their substrates. **(C)** Alignment of the catalytic centers of CslZ and other GH6s hydrolases  
457 including TfCel6A, TfCel6B, CelAB, Cel6H. The conserved residues in the catalytic centers are  
458 grey-colored and the key catalytic residue Asp is labeled with a red arrowhead. The full-length  
459 alignments of the GH6 domains are available in Supplementary Figure 2.

460

461 **Figure 2. The absence of *lpmP* and *csIZ* affects morphogenesis in *S. coelicolor*. (A)**

462 Pellet morphology of strains lacking, or overexpressing genes involved in glycan biosynthesis  
463 and degradation. Pellets were imaged after 48 h of growth in TSBS. The double mutant strain  
464 lacking *lpmP* and *csIZ* ( $\Delta csIZ/\Delta lpmP$ ) is no longer able to form pellets and is phenotypically  
465 similar to the *csIA* mutant ( $\Delta csIA$ ). Pellets of the strains expressing *csIZ* and/or *lpmP* under  
466 control of the constitutive *gapAp* promoter (*gapAp\_csIZ*, *gapAp\_lpmP*,  
467 *gapAp\_csIZ/gapAp\_lpmP*) had a denser appearance after 48 h. Pellets of the strain containing  
468 the empty pSET152 plasmid (*pM145*) were comparable to those of the wild-type. **(B)** Colony  
469 morphology of strains lacking genes involved in glycan biosynthesis and degradation on R5  
470 medium after 5 days of growth. The double mutant lacking *csIZ* and *lpmP* forms smaller  
471 colonies than each of the single mutants and the wild-type strain. In addition, development and  
472 production of the blue antibiotic actinorhodin is blocked in the  $\Delta csIZ/\Delta lpmP$  double mutant. The  
473 latter phenotype is shared with the *csIA* and *matAB* mutants. Scale bar represents 100  $\mu$ m (A)

474 and 20 mm (B).

475

476 **Figure 3. Deposition of the  $\beta$ -(1-4)-glycan at hyphal tips is abolished in the absence of**  
477 **LpmP and CslZ.** Calcofluor white (CFW) staining was used to detect  $\beta$ -(1-4)-glycans in *S.*  
478 *coelicolor* strains lacking, or overexpressing genes involved in glycan biosynthesis and  
479 degradation. As expected, tip staining (arrowheads) is evident in the wild-type strain and  
480 control strain (*pM145*), and absent in the  $\Delta$ *csIA* mutant (see inlays). Tip staining is reduced in  
481 the  $\Delta$ *csIZ* and the  $\Delta$ *lpmP* single mutants but is absent in the  $\Delta$ *lpmP*/ $\Delta$ *csIZ* double mutant.  
482 Expressing *csIZ* and *lpmP* from the constitutive *gapAp* promoter appears to increase tip  
483 staining. Scale bars represent 100  $\mu$ m (main images) and 20  $\mu$ m (inlays).

484

485 **Figure 4. The absence of the CslA-produced polymer causes lysozyme-sensitivity in *S.***  
486 ***coelicolor*.** (A) Growth of the wild-type strain, the  $\Delta$ *csIA* mutant and the  $\Delta$ *lpmP*/ $\Delta$ *csIZ* double  
487 mutant on plates with or without lysozyme (0.25 mg ml<sup>-1</sup>). No growth is observed for the  $\Delta$ *csIA*  
488 mutant and the  $\Delta$ *lpmP*/ $\Delta$ *csIZ* double mutant on plates containing lysozyme. (B) Quantitative  
489 assessment of the number of CFUs obtained following growth in the presence and absence of  
490 lysozyme. N represents the number of colonies on plates with 0.25 mg ml<sup>-1</sup> lysozyme and N<sub>0</sub>  
491 represents the number of colonies on plates without lysozyme. The percentage of N/N<sub>0</sub> was  
492 used as a measure for the sensitivity of each strain for lysozyme. The values represent the  
493 average of triplicate experiments. The error bars indicate the standard errors of the mean.

494

495

496 **Figure 5. LpmP facilitates hydrolysis of peptidoglycan by lysozyme and CslZ.** (A)  
497 SDS-PAGE gel showing purified LpmP (18.4 kDa) and CslZ (31.9 kDa) heterologously  
498 produced in *E. coli*. (B) *In vitro* binding assays of LpmP and CslZ to PG, cellulose and chitin.  
499 CslZ or copper-loaded LpmP were incubated with PG, microcrystalline cellulose or  $\alpha$ -chitin for  
500 3 h at room temperature. The supernatants, containing the unbound proteins (NB) were  
501 collected by centrifugation. The pelleted insoluble polysaccharides were washed, after which  
502 the bound (B) proteins were extracted with 4% SDS. The unbound (NB) and bound (B)  
503 proteins were analysed using a 15 % SDS-PAGE gel, revealing that LpmP binds weakly to

504 chitin and strongly to PG. No binding was observed for CslZ. **(C)** Quantitative assessment of  
505 hydrolytic activity of CslZ on a panel of substrates using a dinitrosalicylic acid assay (DNS).  
506 Total reducing sugar yields were detected with DNS reagent after incubating 20 µg enzymes  
507 (CslZ, cellulase and chitinase) with 4 mg ml<sup>-1</sup> CMC, 8 mg ml<sup>-1</sup> Cellulose, 8 mg ml<sup>-1</sup> Avicel and 8  
508 mg ml<sup>-1</sup> α-Chitin for 72 h (37 °C, pH 7.5), respectively. Glucose (Sigma) was used as the  
509 standard to convert the absorbance to concentration of reducing sugars (in µM). All values  
510 were blanked against the non-enzyme control. Error bars represent the standard error mean of  
511 triplicate measurements. **(D)** LpmP facilitates hydrolysis of PG by lysozyme and CslZ.  
512 Remazol Brilliant blue (RBB)-labelled PG was incubated with CslZ (5 µM), LpmP (1 µM),  
513 lysozyme (5 µM) or combinations thereof. Undigested RBB-PG was removed by centrifugation  
514 and the absorbance of the supernatant (OD595) was used to measure RBB release caused by  
515 hydrolysis. Values were blanked against the non-enzyme control. Error bars represent the  
516 standard error of the mean of triplicate measurements.

517

518 **Figure 6. Proposed model for assembly and deposition of the apical glycan produced**  
519 **by CslA in *Streptomyces*.** CslA utilizes UDP-sugars to synthesize a glycan, which is possibly  
520 modified by the activity of the copper-containing enzyme GlxA. LpmP binds to PG and  
521 introduces random cleavages, allowing further degradation by CslZ to create a passage that  
522 allows exposure of the glycan at the cell surface. The polymer is then integrated in the cell wall,  
523 presumably via interactions involving teichoic acids (7).

524 **SUPPLEMENTARY FIGURE LEGENDS**

525 **Supplementary Figure 1. Comparison of CslZ with other GH6 family members.**

526 Schematic overview of hydrolases belonging to the glycoside hydrolase family 6 (GH6).  
527 Shown are hydrolases from *Streptomyces coelicolor* (CslZ), *Thermobifida fusca* (TfCel6A,  
528 TfCel6B), *Teredinibacter turnerae* (CelAB) and an uncultured bacterium (Cel6H). The signal  
529 peptides (SP), GH6 domains, carbohydrate binding modules (CBMs), cytosolic domain (CD)  
530 and transmembrane helices (TM) are indicated.

531

532 **Supplementary Figure 2. Sequence alignment of GH6 domains.** Sequence alignment of

533 the GH6 domains of hydrolases from *Streptomyces coelicolor* (CslZ), *Thermobifida fusca*  
534 (TfCel6A, TfCel6B), *Teredinibacter turnerae* (CelAB) and an uncultured bacterium (Cel6H).  
535 Conserved residues are grey-colored, and the key catalytic residue Asp is labeled with a red  
536 arrowhead.

537

538 **Supplementary Figure 3. Quantitative analysis of the amount of  $\beta$ -(1,4)-glycans present**  
539 **at hyphal tips of *Streptomyces* strains.** Total fluorescence of calcofluor white-stained tips

540 was determined in square regions of 15  $\mu$ m x 15  $\mu$ m. For each strain, 20 tips were measured.  
541 The total fluorescence in each strain was corrected for the fluorescence measured in the *csIA*  
542 mutant, which does not produce the  $\beta$ -(1,4)-glycan. Fluorescence detected for the wild-type  
543 strain was set to 100%. Error bars represent the standard error of the mean.

544

545 **Supplementary Figure 4. Antibiotic sensitivity of *S. coelicolor* strains lacking genes**

546 **involved in the biosynthesis pathway of the CslA-produced polymer.** Difco nutrient agar  
547 plates (25 ml) were overlaid with 2.5 ml of 0.5% nutrient agar containing  $10^7$  spores of each  
548 strain. Whatman discs (6 mm, Sigma) were placed on top of the soft agar, after which 5  $\mu$ l of  
549 ampicillin (left) or penicillin-G (right) were applied to the discs. Bars indicate the inhibition  
550 zones (in mm) obtained after 48 h growth at 30 °C. Inhibition zones were measured by ImageJ.  
551 Error bars indicated standard errors of the mean.

552

553

554 **Supplementary Figure 5. Copper loading is required for the catalytic activity of LpmP on**  
555 **peptidoglycan.** Remazol Brilliant blue (RBB)-labelled peptidoglycan (PG) was incubated with  
556 CslZ (5  $\mu$ M), apo-LpmP (1  $\mu$ M), copper-loaded LpmP (1  $\mu$ M), lysozyme (5  $\mu$ M) or combinations  
557 thereof. After 3 h at 37°C, undigested RBB-PG was removed by centrifugation, after which the  
558 absorbance (OD595) of the supernatant was measured to quantify the release of RBB from  
559 PG. Values were blanked against the non-enzyme control. Error bars represent the standard  
560 error of triplicate measurements.

561     **REFERENCES**

562

563     1.     Egan AJF, Errington J, Vollmer W. 2020. Regulation of peptidoglycan synthesis and  
564     remodelling.             Nat             Rev             Microbiol             18:446-460.

565     <https://doi.org/10.1038/s41579-020-0366-3>.

566     2.     Brown S, Santa Maria JP, Jr., Walker S. 2013. Wall teichoic acids of Gram-positive  
567     bacteria.             Annu             Rev             Microbiol             67:313-36.

568     <https://doi.org/10.1146/annurev-micro-092412-155620>.

569     3.     Rausch M, Deisinger JP, Ulm H, Müller A, Li W, Hardt P, Wang X, Li X, Sylvester M,  
570     Engeser M, Vollmer W, Müller CE, Sahl HG, Lee JC, Schneider T. 2019. Coordination  
571     of capsule assembly and cell wall biosynthesis in *Staphylococcus aureus*. Nat  
572     Commun 10:1404. <https://doi.org/10.1038/s41467-019-09356-x>.

573     4.     Claessen D, Rozen DE, Kuipers OP, Søgaard-Andersen L, van Wezel GP. 2014.  
574     Bacterial solutions to multicellularity: a tale of biofilms, filaments and fruiting bodies.  
575     Nat Rev Microbiol 12:115-124. <https://doi.org/10.1038/nrmicro3178>.

576     5.     Barka EA, Vatsa P, Sanchez L, Gaveau-Vaillant N, Jacquard C, Klenk HP, Clément C,  
577     Ouhdouch Y, van Wezel GP. 2016. Taxonomy, physiology, and natural products of  
578     *Actinobacteria*.             Microbiol             Mol             Biol             Rev             80:1-43.

579     <https://doi.org/10.1128/MMBR.00019-15>.

580     6.     Barka EA, Vatsa P, Sanchez L, Gavaut-Vaillant N, Jacquard C, Meier-Kolthoff J, Klenk  
581     HP, Clément C, Ouhdouch Y, van Wezel GP. 2016. Taxonomy, physiology, and natural  
582     products of the Actinobacteria. Microbiol Mol Biol Rev 80:1-43.

583     7.     Ultee E, van der Aart LT, van Dissel D, Diebold CA, van Wezel GP, Claessen D,

- 584 Briegel A. 2020. Teichoic acids anchor distinct cell wall lamellae in an apically growing  
585 bacterium. *Commun Biol* 3:314. <https://doi.org/10.1101/714758>.
- 586 8. Flårdh K. 2003. Essential role of DivIVA in polar growth and morphogenesis in  
587 *Streptomyces coelicolor* A3(2). *Mol Microbiol* 49:1523-36.
- 588 9. Howell M, Brown PJB. 2016. Building the bacterial cell wall at the pole. *Curr Opin*  
589 *Microbiol* 34:53-59. <https://doi.org/10.1016/j.mib.2016.07.021>.
- 590 10. van Dissel D, Willemse J, Zacchetti B, Claessen D, Pier G, van Wezel GP. 2018.  
591 Production of poly- $\beta$ -1,6-N-acetylglucosamine by MatAB is required for hyphal  
592 aggregation and hydrophilic surface adhesion by *Streptomyces*. *Microb Cell*  
593 5:269-279.
- 594 11. Petrus MLC, Claessen D. 2014. Pivotal roles for *Streptomyces* cell surface polymers  
595 in morphological differentiation, attachment and mycelial architecture. *Antonie van*  
596 *Leeuwenhoek* 106:127-139.
- 597 12. Xu H, Chater KF, Deng Z, Tao M. 2008. A cellulose synthase-like protein involved in  
598 hyphal tip growth and morphological differentiation in *Streptomyces*. *J Bacteriol*  
599 190:4971-8. <https://doi.org/10.1128/JB.01849-07>.
- 600 13. Petrus MLC, Vijgenboom E, Chaplin AK, Worrall JA, van Wezel GP, Claessen D. 2016.  
601 The DyP-type peroxidase DtpA is a Tat-substrate required for GlxA maturation and  
602 morphogenesis in *Streptomyces*. *Open Biol* 6:150149.  
603 <https://doi.org/10.1098/rsob.150149>.
- 604 14. Chaplin AK, Petrus MLC, Mangiameli G, Hough MA, Svistunenko DA, Nicholls P,  
605 Claessen D, Vijgenboom E, Worrall JAR. 2015. GlxA is a new structural member of



- 606 the radical copper oxidase family and is required for glycan deposition at hyphal tips  
607 and morphogenesis of *Streptomyces lividans*. *Biochem J* 469:433-44.  
608 <https://doi.org/10.1042/BJ20150190>.
- 609 15. Liman R, Facey PD, van Keulen G, Dyson PJ, Del Sol R. 2013. A laterally acquired  
610 galactose oxidase-like gene is required for aerial development during osmotic stress in  
611 *Streptomyces coelicolor*. *PLoS One* 8:e54112.  
612 <https://doi.org/10.1371/journal.pone.0054112>.
- 613 16. Chaplin AK, Wilson MT, Hough MA, Svistunen DA, Hemsworth GR, Walton PH,  
614 Vijgenboom E, Worrall JAR. 2016. Heterogeneity in the histidine-brace copper  
615 coordination sphere in auxiliary activity family 10 (AA10) lytic polysaccharide  
616 monooxygenases. *J Biol Chem* 291:12838-12850.  
617 <https://doi.org/10.1074/jbc.M116.722447>.
- 618 17. Quinlan RJ, Sweeney MD, Lo Leggio L, Otten H, Poulsen JC, Johansen KS, Krogh KB,  
619 Jorgensen CI, Tovborg M, Anthonsen A, Tryfona T, Walter CP, Dupree P, Xu F,  
620 Davies GJ, Walton PH. 2011. Insights into the oxidative degradation of cellulose by a  
621 copper metalloenzyme that exploits biomass components. *Proc Natl Acad Sci U S A*  
622 108:15079-84. <https://doi.org/10.1073/pnas.1105776108>.
- 623 18. Walton PH, Davies GJ. 2016. On the catalytic mechanisms of lytic polysaccharide  
624 monooxygenases. *Curr Opin Chem Biol* 31:195-207.  
625 <https://doi.org/10.1016/j.cbpa.2016.04.001>.
- 626 19. Eijsink VGH, Petrovic D, Forsberg Z, Mekasha S, Røhr ÅK, Várnai A, Bissaro B,  
627 Vaaje-Kolstad G. 2019. On the functional characterization of lytic polysaccharide

- 628 monooxygenases (LPMOs). *Biotechnol Biofuels* 12:58.  
629 <https://doi.org/10.1186/s13068-019-1392-0>.
- 630 20. Bissaro B, Streit B, Isaksen I, Eijsink VGH, Beckham GT, DuBois JL, Røhr ÅK. 2020.  
631 Molecular mechanism of the chitinolytic peroxygenase reaction. *Proc Natl Acad Sci U*  
632 *S A* 117:1504-1513. <https://doi.org/10.1073/pnas.1904889117>.
- 633 21. Song B, Li B, Wang X, Shen W, Park S, Collings C, Feng A, Smith SJ, Walton JD,  
634 Ding SY. 2018. Real-time imaging reveals that lytic polysaccharide monooxygenase  
635 promotes cellulase activity by increasing cellulose accessibility. *Biotechnol Biofuels*  
636 11:41. <https://doi.org/10.1186/s13068-018-1023-1>.
- 637 22. Lo Leggio L, Simmons TJ, Poulsen JC, Frandsen KE, Hemsworth GR, Stringer MA,  
638 von Freiesleben P, Tovborg M, Johansen KS, De Maria L, Harris PV, Soong CL,  
639 Dupree P, Tryfona T, Lenfant N, Henrissat B, Davies GJ, Walton PH. 2015. Structure  
640 and boosting activity of a starch-degrading lytic polysaccharide monooxygenase. *Nat*  
641 *Commun* 6:5961. <https://doi.org/10.1038/ncomms6961>.
- 642 23. Askarian F, Uchiyama S, Masson H, Sorensen HV, Golten O, Bunæs AC, Mekasha S,  
643 Røhr ÅK, Kommedal E, Ludviksen JA, Arntzen MØ, Schmidt B, Zurich RH, van Sorge  
644 NM, Eijsink VGH, Krengel U, Mollnes TE, Lewis NE, Nizet V, Vaaje-Kolstad G. 2021.  
645 The lytic polysaccharide monooxygenase CbpD promotes *Pseudomonas aeruginosa*  
646 virulence in systemic infection. *Nat Commun* 12:1230.  
647 <https://doi.org/10.1038/s41467-021-21473-0>.
- 648 24. Garcia-Santamarina S, Probst C, Festa RA, Ding C, Smith AD, Conklin SE, Brander S,  
649 Kinch LN, Grishin NV, Franz KJ, Riggs-Gelasco P, Lo Leggio L, Johansen KS, Thiele

- 650 DJ. 2020. A lytic polysaccharide monooxygenase-like protein functions in fungal  
651 copper import and meningitis. *Nat Chem Biol* 16:337-344.  
652 <https://doi.org/10.1038/s41589-019-0437-9>.
- 653 25. Li F, Ma F, Zhao H, Zhang S, Wang L, Zhang X, Yu H. 2019. A lytic polysaccharide  
654 monooxygenase from a white-rot fungus drives the degradation of lignin by a versatile  
655 peroxidase. *Appl Environ Microbiol* 85. <https://doi.org/10.1128/AEM.02803-18>.
- 656 26. Li F, Zhang J, Ma F, Chen Q, Xiao Q, Zhang X, Xie S, Yu H. 2021. Lytic  
657 polysaccharide monooxygenases promote oxidative cleavage of lignin and  
658 lignin-carbohydrate complexes during fungal degradation of lignocellulose. *Environ*  
659 *Microbiol* 23:4547-4560. <https://doi.org/10.1111/1462-2920.15648>.
- 660 27. de Jong W, Wösten HAB, Dijkhuizen L, Claessen D. 2009. Attachment of  
661 *Streptomyces coelicolor* is mediated by amyloid fimbriae that are anchored to the  
662 cell surface via cellulose. *Mol Microbiol* 73:1128-40.  
663 <https://doi.org/10.1111/j.1365-2958.2009.06838.x>.
- 664 28. Keenan T, Dowle A, Bates R, Smith MCM. 2019. Characterization of the  
665 *Streptomyces coelicolor* glycoproteome reveals glycoproteins important for cell wall  
666 biogenesis. *mBio* 10. <https://doi.org/10.1128/mBio.01092-19>.
- 667 29. Cantarel BL, Coutinho PM, Rancurel C, Bernard T, Lombard V, Henrissat B. 2009.  
668 The Carbohydrate-Active EnZymes database (CAZy): an expert resource for  
669 glycogenomics. *Nucleic Acids Res* 37:D233-8. <https://doi.org/10.1093/nar/gkn663>.
- 670 30. Liu Y, Yoshida M, Kurakata Y, Miyazaki T, Igarashi K, Samejima M, Fukuda K,  
671 Nishikawa A, Tonozuka T. 2010. Crystal structure of a glycoside hydrolase family 6

- 672 enzyme, CcCel6C, a cellulase constitutively produced by *Coprinopsis cinerea*. FEBS J  
673 277:1532-42. <https://doi.org/10.1111/j.1742-4658.2010.07582.x>.
- 674 31. André G, Kanchanawong P, Palma R, Cho H, Deng X, Irwin D, Himmel ME, Wilson  
675 DB, Brady JW. 2003. Computational and experimental studies of the catalytic  
676 mechanism of *Thermobifida fusca* cellulase Cel6A (E2). Protein Eng 16:125-34.  
677 <https://doi.org/10.1093/proeng/gzg017>.
- 678 32. Jensen MS, Fredriksen L, MacKenzie AK, Pope PB, Leiros I, Chylenski P, Williamson  
679 AK, Christopeit T, Østby H, Vaaje-Kolstad G, Eijsink VGH. 2018. Discovery and  
680 characterization of a thermostable two-domain GH6 endoglucanase from a compost  
681 metagenome. PLoS One 13:e0197862. <https://doi.org/10.1371/journal.pone.0197862>.
- 682 33. Agger JW, Isaksen T, Várnai A, Vidal-Melgosa S, Willats WG, Ludwig R, Horn SJ,  
683 Eijsink VG, Westereng B. 2014. Discovery of LPMO activity on hemicelluloses shows  
684 the importance of oxidative processes in plant cell wall degradation. Proc Natl Acad  
685 Sci U S A 111:6287-92. <https://doi.org/10.1073/pnas.1323629111>.
- 686 34. Zacchetti B, Willemse J, Recter B, van Dissel D, van Wezel GP, Wösten HAB,  
687 Claessen D. 2016. Aggregation of germlings is a major contributing factor towards  
688 mycelial heterogeneity of *Streptomyces*. Sci Rep 6:27045.  
689 <https://doi.org/10.1038/srep27045>.
- 690 35. Chater KF. 2016. Recent advances in understanding Streptomyces. F1000Res 5:2795.  
691 <https://doi.org/10.12688/f1000research.9534.1>.
- 692 36. Agostoni M, Hangasky JA, Marletta MA. 2017. Physiological and molecular  
693 understanding of bacterial polysaccharide monooxygenases. Microbiol Mol Biol Rev

- 694 81. <https://doi.org/10.1128/MMBR.00015-17>.
- 695 37. Tan TC, Kracher D, Gandini R, Sygmund C, Kittl R, Haltrich D, Hällberg BM, Ludwig R,  
696 Divne C. 2015. Structural basis for cellobiose dehydrogenase action during oxidative  
697 cellulose degradation. *Nat Commun* 6:7542. <https://doi.org/10.1038/ncomms8542>.
- 698 38. Frommhagen M, Mutte SK, Westphal AH, Koetsier MJ, Hinz SWA, Visser J, Vincken  
699 JP, Weijers D, van Berkel WJH, Gruppen H, Kabel MA. 2017. Boosting LPMO-driven  
700 lignocellulose degradation by polyphenol oxidase-activated lignin building blocks.  
701 *Biotechnol Biofuels* 10:121. <https://doi.org/10.1186/s13068-017-0810-4>.
- 702 39. Sabbadin F, Hemsworth GR, Ciano L, Henrissat B, Dupree P, Tryfona T, Marques  
703 RDS, Sweeney ST, Besser K, Elias L, Pesante G, Li Y, Dowle AA, Bates R, Gomez  
704 LD, Simister R, Davies GJ, Walton PH, Bruce NC, McQueen-Mason SJ. 2018. An  
705 ancient family of lytic polysaccharide monooxygenases with roles in arthropod  
706 development and biomass digestion. *Nat Commun* 9:756.  
707 <https://doi.org/10.1038/s41467-018-03142-x>.
- 708 40. Paspaliari DK, Loose JS, Larsen MH, Vaaje-Kolstad G. 2015. *Listeria monocytogenes*  
709 has a functional chitinolytic system and an active lytic polysaccharide monooxygenase.  
710 *FEBS J* 282:921-36. <https://doi.org/10.1111/febs.13191>.
- 711 41. Forsberg Z, Mackenzie AK, Sørli M, Røhr ÅK, Helland R, Arvai AS, Vaaje-Kolstad G,  
712 Eijsink VGH. 2014. Structural and functional characterization of a conserved pair of  
713 bacterial cellulose-oxidizing lytic polysaccharide monooxygenases. *Proc Natl Acad Sci*  
714 U S A 111:8446-51. <https://doi.org/10.1073/pnas.1402771111>.
- 715 42. Nakagawa YS, Kudo M, Loose JS, Ishikawa T, Totani K, Eijsink VGH, Vaaje-Kolstad

- 716 G. 2015. A small lytic polysaccharide monooxygenase from *Streptomyces griseus*  
717 targeting  $\alpha$ - and  $\beta$ -chitin. FEBS J 282:1065-79. <https://doi.org/10.1111/febs.13203>.
- 718 43. Takasuka TE, Book AJ, Lewin GR, Currie CR, Fox BG. 2013. Aerobic deconstruction  
719 of cellulosic biomass by an insect-associated *Streptomyces*. Sci Rep 3:1030.  
720 <https://doi.org/10.1038/srep01030>.
- 721 44. Bentley SD, Chater KF, Cerdeno-Tarraga AM, Challis GL, Thomson NR, James KD,  
722 Harris DE, Quail MA, Kieser H, Harper D, Bateman A, Brown S, Chandra G, Chen CW,  
723 Collins M, Cronin A, Fraser A, Goble A, Hidalgo J, Hornsby T, Howarth S, Huang CH,  
724 Kieser T, Larke L, Murphy L, Oliver K, O'Neil S, Rabinowitsch E, Rajandream MA,  
725 Rutherford K, Rutter S, Seeger K, Saunders D, Sharp S, Squares R, Squares S,  
726 Taylor K, Warren T, Wietzorrek A, Woodward J, Barrell BG, Parkhill J, Hopwood DA.  
727 2002. Complete genome sequence of the model actinomycete *Streptomyces*  
728 *coelicolor* A3(2). Nature 417:141-7. <https://doi.org/10.1038/417141a>.
- 729 45. Chater KF, Biro S, Lee KJ, Palmer T, Schrempf H. 2010. The complex extracellular  
730 biology of *Streptomyces*. FEMS Microbiol Rev 34:171-98.  
731 <https://doi.org/10.1111/j.1574-6976.2009.00206.x>.
- 732 46. Walter S, Schrempf H. 2008. Characteristics of the surface-located  
733 carbohydrate-binding protein CbpC from *Streptomyces coelicolor* A3(2). Arch  
734 Microbiol 190:119-27. <https://doi.org/10.1007/s00203-008-0373-7>.
- 735 47. Acheson JF, Derewenda ZS, Zimmer J. 2019. Architecture of the cellulose synthase  
736 outer membrane channel and its association with the periplasmic TPR domain.  
737 Structure 27:1855-1861 e3. <https://doi.org/10.1016/j.str.2019.09.008>.

- 738 48. Benziman M, Haigler CH, Brown RM, White AR, Cooper KM. 1980. Cellulose  
739 biogenesis: Polymerization and crystallization are coupled processes in *Acetobacter*  
740 *xylinum*. Proc Natl Acad Sci U S A 77:6678-6682.
- 741 49. Nakai T, Sugano Y, Shoda M, Sakakibara H, Oiwa K, Tuzi S, Imai T, Sugiyama J,  
742 Takeuchi M, Yamauchi D, Mineyuki Y. 2013. Formation of highly twisted ribbons in a  
743 carboxymethylcellulase gene-disrupted strain of a cellulose-producing bacterium. J  
744 Bacteriol 195:958-64. <https://doi.org/10.1128/JB.01473-12>.
- 745 50. Kieser T, Bibb MJ, Buttner MJ, Chater KF, Hopwood DA. 2000. Practical  
746 *Streptomyces* genetics. The John Innes Foundation, Norwich.
- 747 51. Flett F, Mersinias V, Smith CP. 1997. High efficiency intergeneric conjugal transfer of  
748 plasmid DNA from *Escherichia coli* to methyl DNA-restricting streptomycetes. FEMS  
749 Microbiol Lett 155:223-9.
- 750 52. Hanahan D. 1983. Studies on transformation of *Escherichia coli* with plasmids. J Mol  
751 Biol 166:557-80.
- 752 53. Bierman M, Logan R, O'Brien K, Seno ET, Rao RN, Schonher BE. 1992. Plasmid  
753 cloning vectors for the conjugal transfer of DNA from *Escherichia coli* to *Streptomyces*  
754 spp. Gene 116:43-9.
- 755 54. Tong Y, Whitford CM, Robertsen HL, Blin K, Jørgensen TS, Klitgaard AK, Gren T,  
756 Jiang X, Weber T, Lee SY. 2019. Highly efficient DSB-free base editing for  
757 streptomycetes with CRISPR-BEST. Proc Natl Acad Sci U S A 116:20366-20375.  
758 <https://doi.org/10.1073/pnas.1913493116>.
- 759 55. Blin K, Pedersen LE, Weber T, Lee SY. 2016. CRISPy-web: An online resource to

- 760 design sgRNAs for CRISPR applications. *Synth Syst Biotechnol* 1:118-121.
- 761 <https://doi.org/10.1016/j.synbio.2016.01.003>.
- 762 56. Wheeler D, Bhagwat M. 2007. BLAST QuickStart: example-driven web-based BLAST
- 763 tutorial. *Methods Mol Biol* 395:149-76.
- 764 57. Dereeper A, Guignon V, Blanc G, Audic S, Buffet S, Chevenet F, Dufayard JF,
- 765 Guindon S, Lefort V, Lescot M, Claverie JM, Gascuel O. 2008. Phylogeny.fr: robust
- 766 phylogenetic analysis for the non-specialist. *Nucleic Acids Res* 36:W465-9.
- 767 <https://doi.org/10.1093/nar/gkn180>.
- 768 58. Cazemier AE, Verdoes JC, Op den Camp HJM, Hackstein JHP, van Ooyen AJJ. 1999.
- 769 A  $\beta$ -1,4-endoglucanase-encoding gene from *Cellulomonas pachnodae*. *Appl Microbiol*
- 770 *Biotechnol* 52:232-9. <https://doi.org/10.1007/s002530051514>.
- 771 59. Ekborg NA, Morrill W, Burgoyne AM, Li L, Distel DL. 2007. CelAB, a multifunctional
- 772 cellulase encoded by *Teredinibacter tumerae* T7902T, a culturable symbiont isolated
- 773 from the wood-boring marine bivalve *Lyrodus pedicellatus*. *Appl Environ Microbiol*
- 774 73:7785-8. <https://doi.org/10.1128/AEM.00876-07>.
- 775 60. Meinke A, Gilkes NR, Kwan E, Kilburn DG, Warren RA, Miller RC, Jr. 1994.
- 776 Cellobiohydrolase A (CbhA) from the cellulolytic bacterium *Cellulomonas fimi* is a
- 777  $\beta$ -1,4-exocellobiohydrolase analogous to *Trichodema reesei* CBH II. *Mol Microbiol*
- 778 12:413-22. <https://doi.org/10.1111/j.1365-2958.1994.tb01030.x>.
- 779 61. Kim DY, Ham SJ, Kim HJ, Kim J, Lee MH, Cho HY, Shin DH, Rhee YH, Son KH, Park
- 780 HY. 2012. Novel modular endo- $\beta$ -1,4-xylanase with transglycosylation activity from
- 781 *Cellulosimicrobium* sp. strain HY-13 that is homologous to inverting GH family 6



- 782 enzymes. Bioresour Technol 107:25-32.  
783 <https://doi.org/10.1016/j.biortech.2011.12.106>.
- 784 62. Park CS, Kawaguchi T, Sumitani J, Takada G, Izumori K, Arai M. 2005. Cloning and  
785 sequencing of an exoglucanase gene from *Streptomyces* sp. M 23, and its expression  
786 in *Streptomyces lividans* TK-24. J Biosci Bioeng 99:434-6.  
787 <https://doi.org/10.1263/jbb.99.434>.
- 788 63. Wu M, Bu L, Vuong TV, Wilson DB, Crowley MF, Sandgren M, Ståhlberg J, Beckham  
789 GT, Hansson H. 2013. Loop motions important to product expulsion in the  
790 *Thermobifida fusca* glycoside hydrolase family 6 cellobiohydrolase from structural and  
791 computational studies. J Biol Chem 288:33107-17.  
792 <https://doi.org/10.1074/jbc.M113.502765>.
- 793 64. Wong WKR, Gerhard B, Guo ZM, Kilburn DG, Warren AJ, Miller RC, Jr. 1986.  
794 Characterization and structure of an endoglucanase gene *cenA* of *Cellulomonas fimi*.  
795 Gene 44:315-24. [https://doi.org/10.1016/0378-1119\(86\)90196-4](https://doi.org/10.1016/0378-1119(86)90196-4).
- 796 65. Moriyoshi K, Koma D, Yamanaka H, Ohmoto T, Sakai K. 2010. Functional analysis of  
797 the carbohydrate-binding module of an esterase from *Neisseria sicca* SB involved in  
798 the degradation of cellulose acetate. Biosci Biotechnol Biochem 74:1940-2.  
799 <https://doi.org/10.1271/bbb.100213>.
- 800 66. Larsson AM, Bergfors T, Dultz E, Irwin DC, Roos A, Driguez H, Wilson DB, Jones TA.  
801 2005. Crystal structure of *Thermobifida fusca* endoglucanase Cel6A in complex with  
802 substrate and inhibitor: the role of tyrosine Y73 in substrate ring distortion.  
803 Biochemistry 44:12915-22. <https://doi.org/10.1021/bi0506730>.

- 804 67. Lin F, Marchenko G, Cheng YR. 1994. Cloning and sequencing of an  
805 endo- $\beta$ -1,4-glucanase gene *mcenA* from *Micromonospora cellulolyticum* 86W-16. J  
806 Ind Microbiol 13:344-50. <https://doi.org/10.1007/BF01577217>.
- 807 68. Wright RM, Yablonsky MD, Shalita ZP, Goyal AK, Eveleigh DE. 1992. Cloning,  
808 characterization, and nucleotide sequence of a gene encoding *Microbispora bispora*  
809 BglB, a thermostable  $\beta$ -glucosidase expressed in *Escherichia coli*. Appl Environ  
810 Microbiol 58:3455-65. <https://doi.org/10.1128/aem.58.11.3455-3465.1992>.
- 811 69. Schindelin J, Arganda-Carreras I, Frise E, Kaynig V, Longair M, Pietzsch T, Preibisch  
812 S, Rueden C, Saalfeld S, Schmid B, Tinevez JY, White DJ, Hartenstein V, Eliceiri K,  
813 Tomancak P, Cardona A. 2012. Fiji: an open-source platform for biological-image  
814 analysis. Nat Methods 9:676-82. <https://doi.org/10.1038/nmeth.2019>.
- 815 70. Yang LC, Gan YL, Yang LY, Jiang BL, Tang JL. 2018. Peptidoglycan hydrolysis  
816 mediated by the amidase AmiC and its LytM activator NlpD is critical for cell  
817 separation and virulence in the phytopathogen *Xanthomonas campestris*. Mol Plant  
818 Pathol 19:1705-1718. <https://doi.org/10.1111/mpp.12653>.
- 819 71. Santin YG, Cascales E. 2017. Measure of peptidoglycan hydrolase activity. Methods  
820 Mol Biol 1615:151-158. [https://doi.org/10.1007/978-1-4939-7033-9\\_12](https://doi.org/10.1007/978-1-4939-7033-9_12).
- 821 72. Varrot A. 2005. Mycobacterium tuberculosis Strains Possess Functional Cellulases.  
822 JBC.
- 823 73. Medema MH, Takano E, Breitling R. 2013. Detecting sequence homology at the gene  
824 cluster level with MultiGeneBlast. Mol Biol Evol 30:1218-23.  
825 <https://doi.org/10.1093/molbev/mst025>.



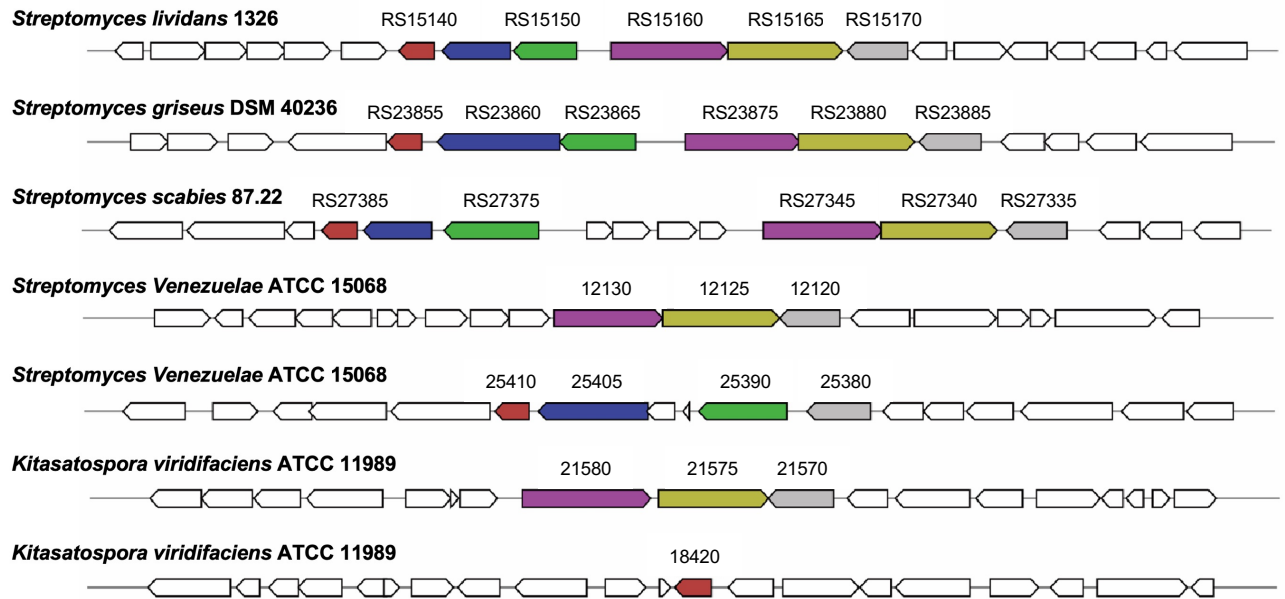

**B**

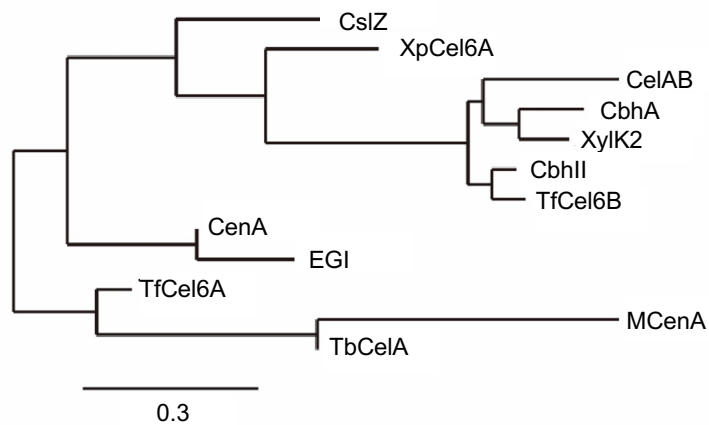

**C**

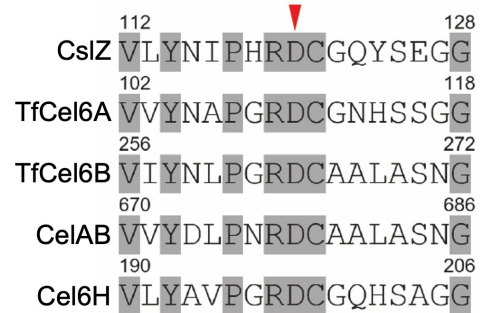

**Figure 1. Comparative analysis of glycoside hydrolase family 6 proteins. (A)** MultiGeneBlast output showing gene clusters of filamentous actinobacteria, which are homologous to the *csA-glxA-csZ* gene cluster of *S. coelicolor* involved in synthesis of a cellulose-like polymer. Clusters have a minimal identity of 30% and minimal sequence coverage of 25% to the *S. coelicolor* gene cluster. **(B)** Phylogenetic tree of members of the GH6 family including CslZ (*S. coelicolor*), XpCel6A (*Xylanimicrobium pachnodae*), CelAB (*Teredinibacter turerae* T7901), CbhA (*Cellulomonas fimi* ATCC 484), XylK2 (*Cellulosimicrobium* sp. HY-13), CbhII (*Streptomyces* sp. M23), TfCel6B (*Thermobifida fusca* YX), CenA (*Mycobacterium tuberculosis* H37Rv), EGI (*Neisseria sicca* SB), TfCel6A (*Thermobifida fusca* YX), McenA (*Micromonospora cellulolyticum*) and TbCela (*Thermobispora bispora*), which were selected based on the availability of experimental data on their substrates. **(C)** Alignment of the catalytic centers of CslZ and other GH6s hydrolases including TfCel6A, TfCel6B, CelAB, Cel6H. The conserved residues in the catalytic centers are grey-colored and the key catalytic residue Asp is labeled with a red arrowhead. The full-length alignments of the GH6 domains are available in Supplementary Figure 2.

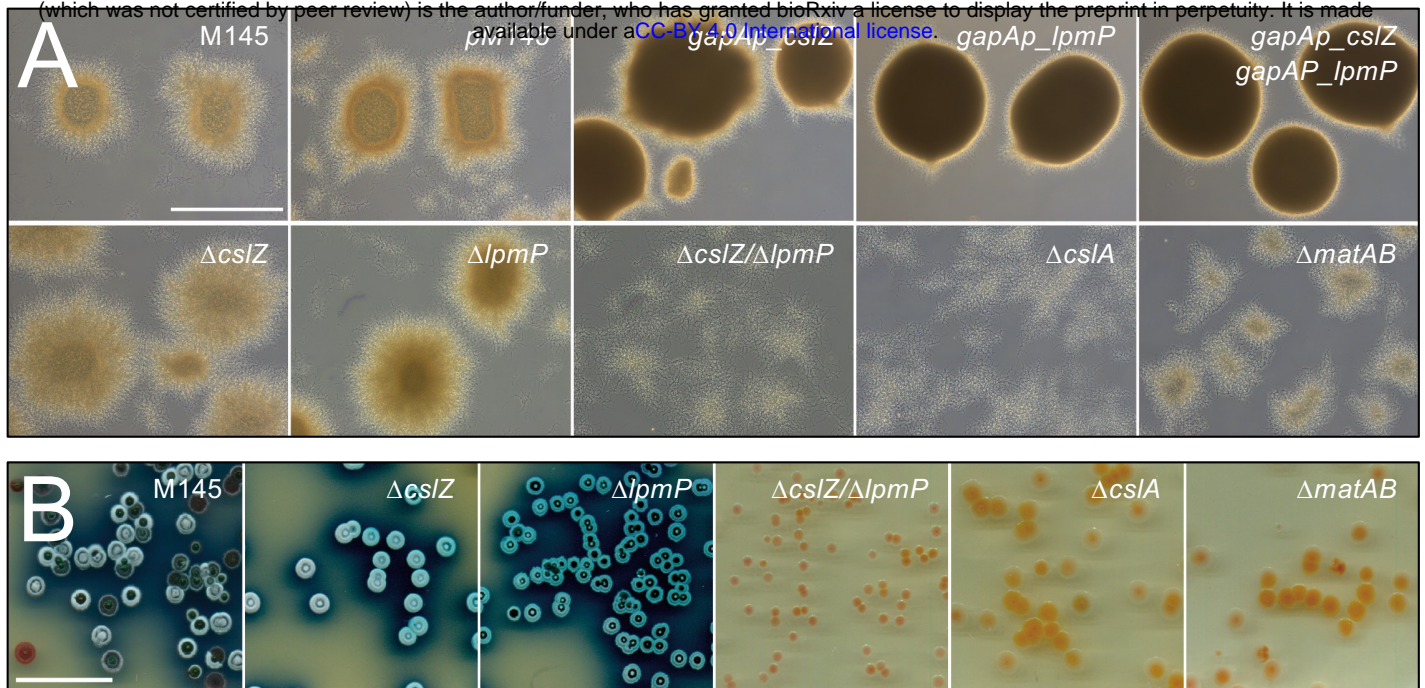

**Figure 2. The absence of *lpmP* and *csZ* affects morphogenesis in *S. coelicolor*.** (A) Pellet morphology of strains lacking, or overexpressing genes involved in glycan biosynthesis and degradation. Pellets were imaged after 48 h of growth in TSBS. The double mutant strain lacking *lpmP* and *csZ* ( $\Delta csZ/\Delta lpmP$ ) is no longer able to form pellets and is phenotypically similar to the *csA* mutant ( $\Delta csA$ ). Pellets of the strains expressing *csZ* and/or *lpmP* under control of the constitutive *gapAp* promoter (*gapAp\_csZ*, *gapAp\_lpmP*, *gapAp\_csZ/gapAp\_lpmP*) had a denser appearance after 48 h. Pellets of the strain containing the empty pSET152 plasmid (*pM145*) were comparable to those of the wild-type. (B) Colony morphology of strains lacking genes involved in glycan biosynthesis and degradation on R5 medium after 5 days of growth. The double mutant lacking *csZ* and *lpmP* forms smaller colonies than each of the single mutants and the wild-type strain. In addition, development and production of the blue antibiotic actinorhodin is blocked in the  $\Delta csZ/\Delta lpmP$  double mutant. The latter phenotype is shared with the *csA* and *matAB* mutants. Scale bar represents 100  $\mu$ m (A) and 20 mm (B).

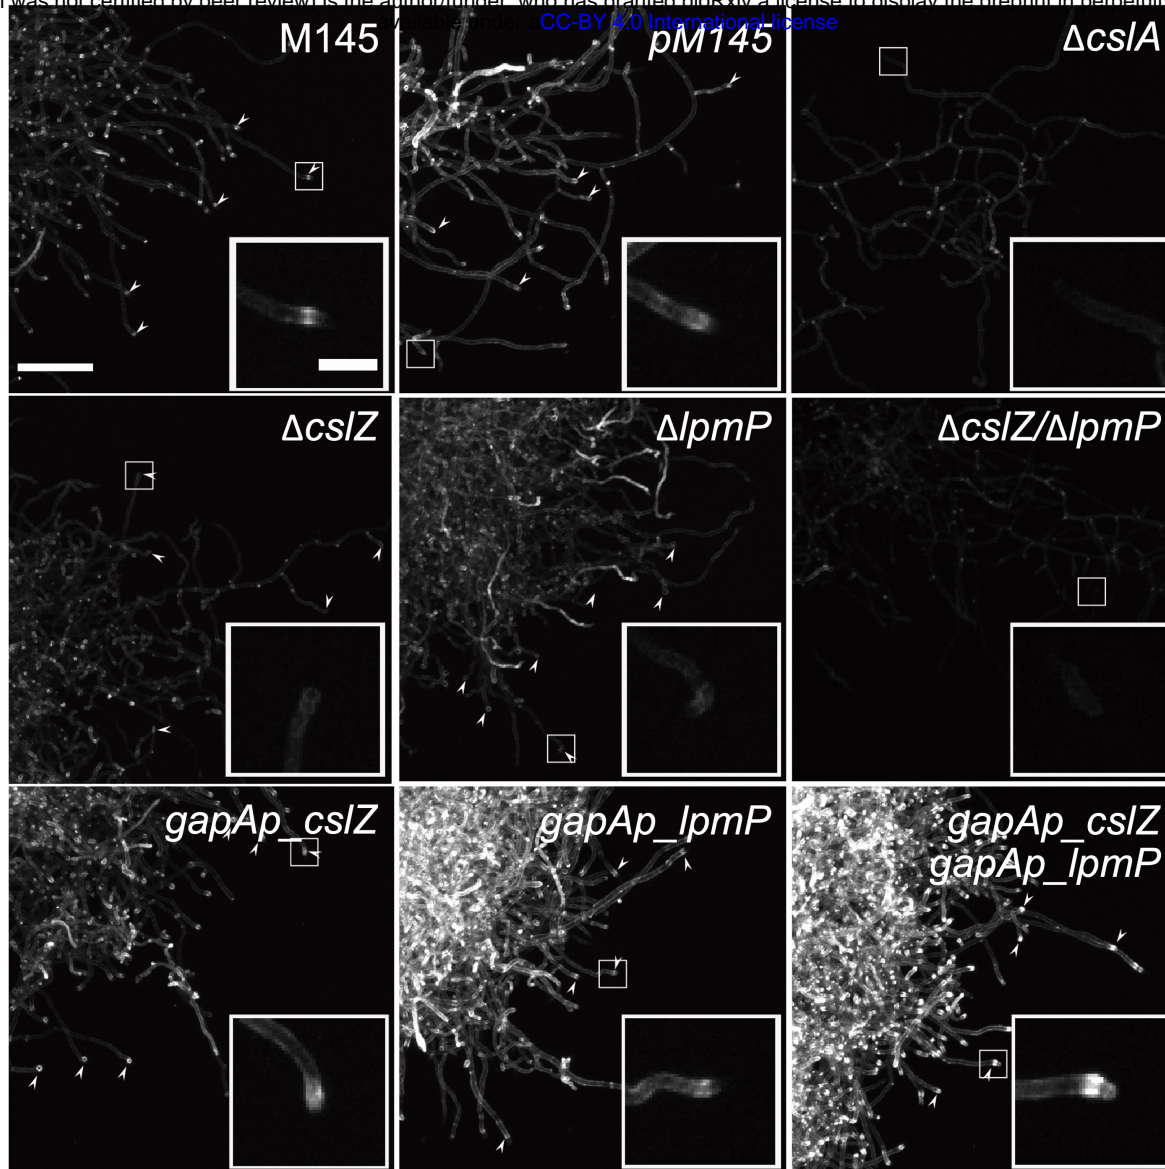

**Figure 3. Deposition of the  $\beta$ -(1-4)-glycan at hyphal tips is abolished in the absence of LpmP and CsiZ.** Calcofluor white (CFW) staining was used to detect  $\beta$ -(1-4)-glycans in *S. coelicolor* strains lacking, or overexpressing genes involved in glycan biosynthesis and degradation. As expected, tip staining (arrowheads) is evident in the wild-type strain and control strain (*pM145*), and absent in the  $\Delta$ *csiA* mutant (see inlays). Tip staining is reduced in the  $\Delta$ *csiZ* and the  $\Delta$ *lpmP* single mutants but is absent in the  $\Delta$ *lpmP*/ $\Delta$ *csiZ* double mutant. Expressing *csiZ* and *lpmP* from the constitutive *gapAp* promoter appears to increase tip staining. Scale bars represent 100  $\mu$ m (main images) and 20  $\mu$ m (inlays).

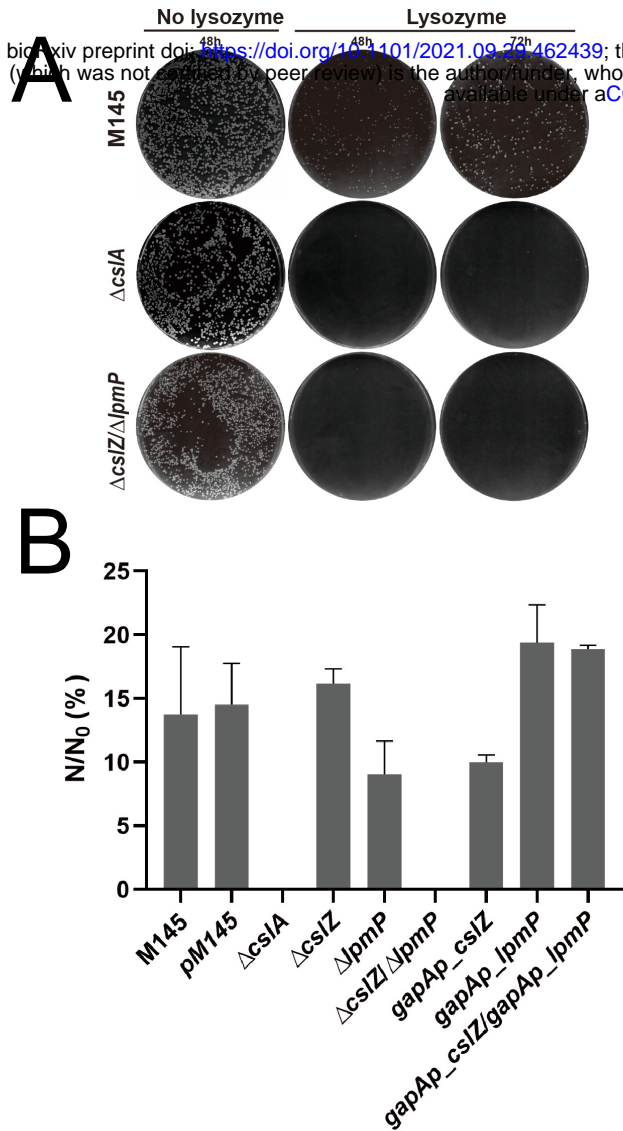

**Figure 4. The absence of the CslA-produced polymer causes lysozyme-sensitivity in *S. coelicolor*.** (A) Growth of the wild-type strain, the  $\Delta csIA$  mutant and the  $\Delta lpmP/\Delta csIZ$  double mutant on plates with or without lysozyme (0.25 mg ml<sup>-1</sup>). No growth is observed for the  $\Delta csIA$  mutant and the  $\Delta lpmP/\Delta csIZ$  double mutant on plates containing lysozyme. (B) Quantitative assessment of the number of CFUs obtained following growth in the presence and absence of lysozyme. N represents the number of colonies on plates with 0.25 mg ml<sup>-1</sup> lysozyme and N<sub>0</sub> represents the number of colonies on plates without lysozyme. The percentage of N/N<sub>0</sub> was used as a measure for the sensitivity of each strain for lysozyme. The values represent the average of triplicate experiments. The error bars indicate the standard errors of the mean.

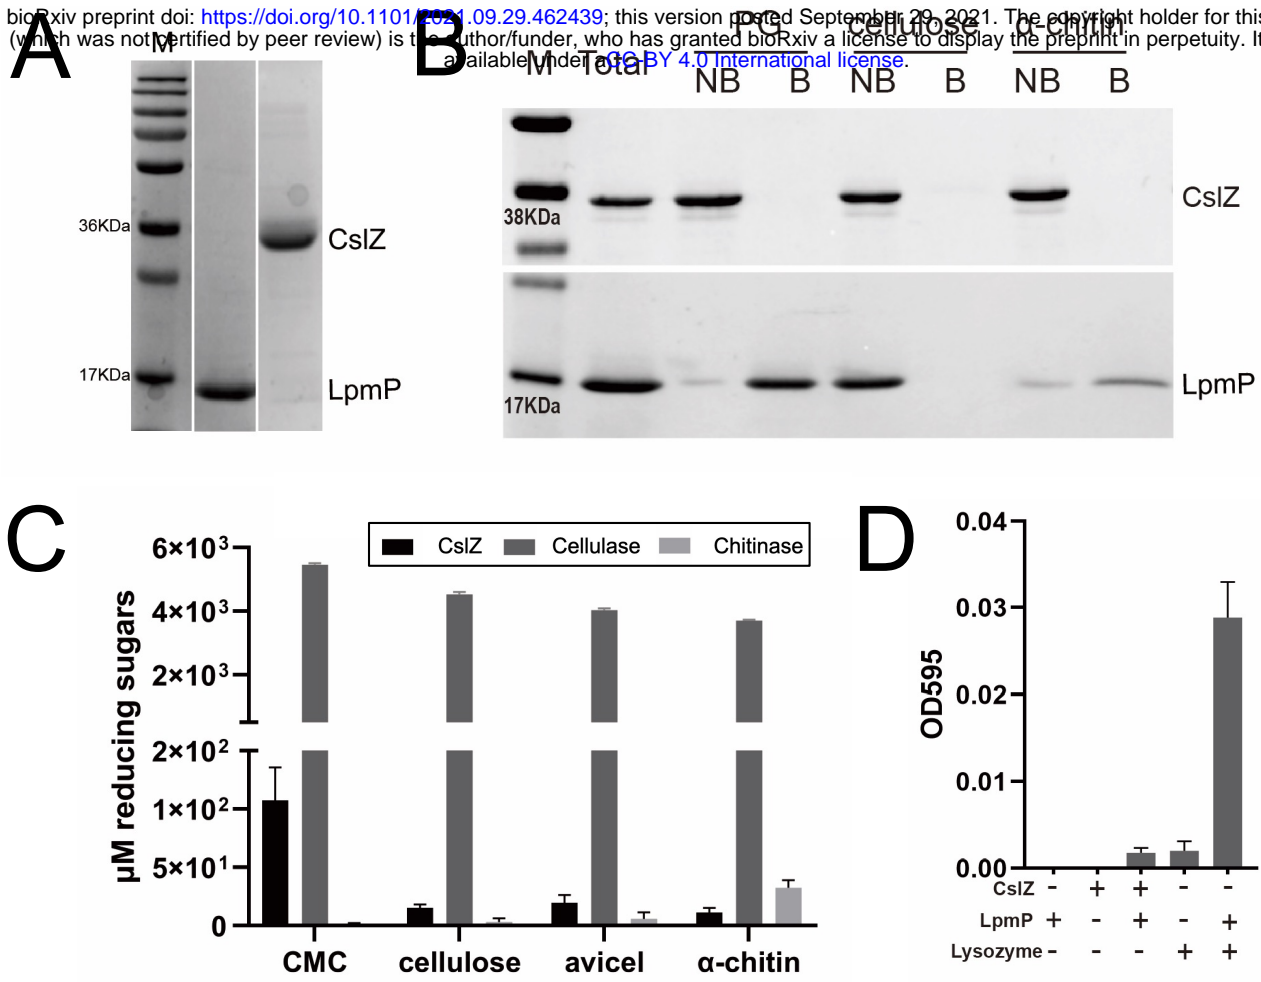

**Figure 5. LpmP facilitates hydrolysis of peptidoglycan by lysozyme and CslZ. (A)** SDS-PAGE gel showing purified LpmP (18.4 kDa) and CslZ (31.9 kDa) heterologously produced in *E. coli*. **(B)** In vitro binding assays of LpmP and CslZ to PG, cellulose and chitin. CslZ or copper-loaded LpmP were incubated with PG, microcrystalline cellulose or  $\alpha$ -chitin for 3 h at room temperature. The supernatants, containing the unbound proteins (NB) were collected by centrifugation. The pelleted insoluble polysaccharides were washed, after which the bound (B) proteins were extracted with 4% SDS. The unbound (NB) and bound (B) proteins were analysed using a 15 % SDS-PAGE gel, revealing that LpmP binds weakly to chitin and strongly to PG. No binding was observed for CslZ. **(C)** Quantitative assessment of hydrolytic activity of CslZ on a panel of substrates using a dinitrosalicylic acid assay (DNS). Total reducing sugar yields were detected with DNS reagent after incubating 20  $\mu\text{g}$  enzymes (CslZ, cellulase and chitinase) with 4 mg ml<sup>-1</sup> CMC, 8 mg ml<sup>-1</sup> Cellulose, 8 mg ml<sup>-1</sup> Avicel and 8 mg ml<sup>-1</sup>  $\alpha$ -Chitin for 72 h (37 °C, pH 7.5), respectively. Glucose (Sigma) was used as the standard to convert the absorbance to concentration of reducing sugars (in  $\mu\text{M}$ ). All values were blanked against the non-enzyme control. Error bars represent the standard error mean of triplicate measurements. **(D)** LpmP facilitates hydrolysis of PG by lysozyme and CslZ. Remazol Brilliant blue (RBB)-labelled PG was incubated with CslZ (5  $\mu\text{M}$ ), LpmP (1  $\mu\text{M}$ ), lysozyme (5  $\mu\text{M}$ ) or combinations thereof. Undigested RBB-PG was removed by centrifugation and the absorbance of the supernatant (OD595) was used to measure RBB release caused by hydrolysis. Values were blanked against the non-enzyme control. Error bars represent the standard error of the mean of triplicate measurements.



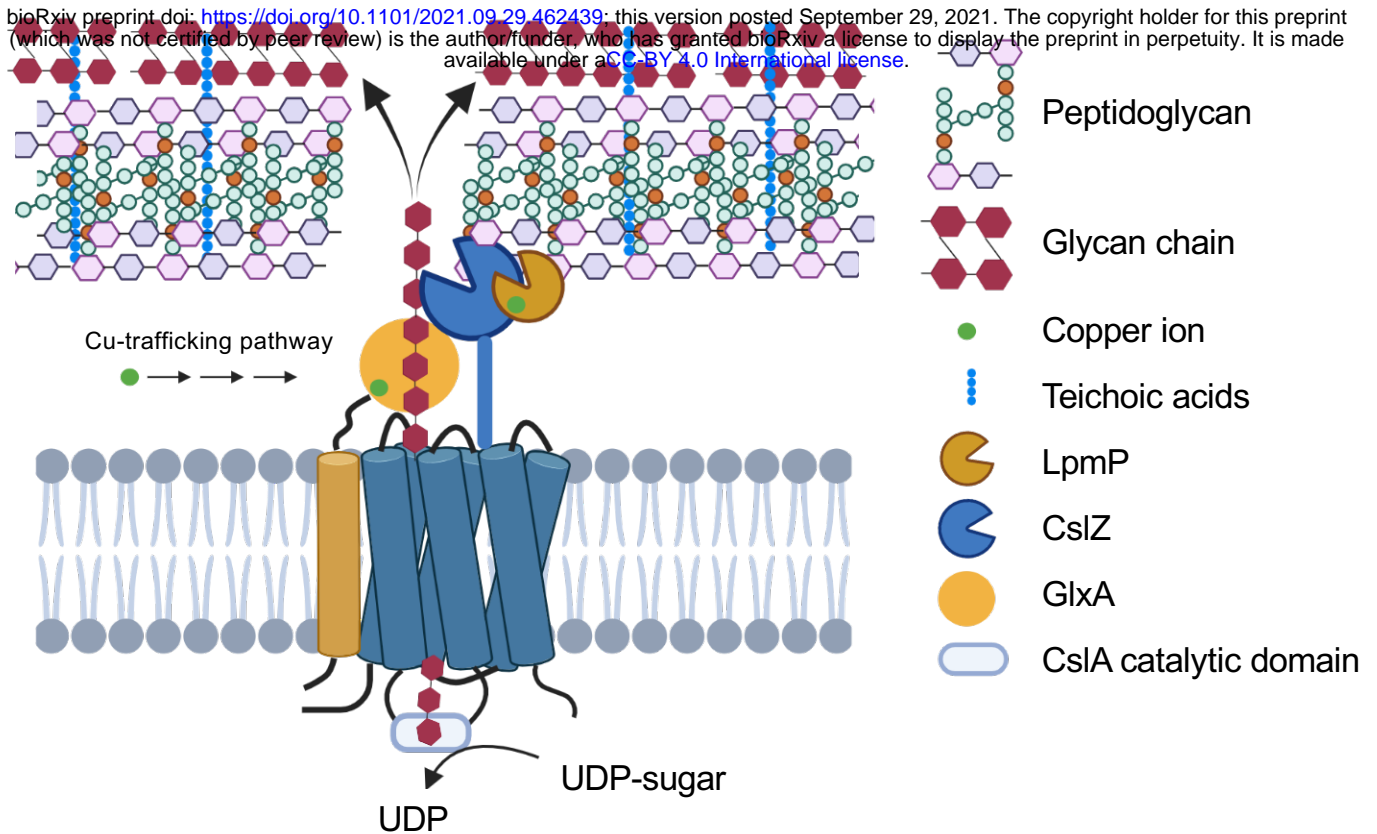

**Figure 6. Proposed model for assembly and deposition of the apical glycan produced by CslA in *Streptomyces*.** CslA utilizes UDP-sugars to synthesize a glycan, which is possibly modified by the activity of the copper-containing enzyme GlxA. LpmP binds to PG and introduces random cleavages, allowing further degradation by CslZ to create a passage that allows exposure of the glycan at the cell surface. The polymer is then integrated in the cell wall, presumably via interactions involving teichoic acids (Ultee, van der Aart, et al., 2020).

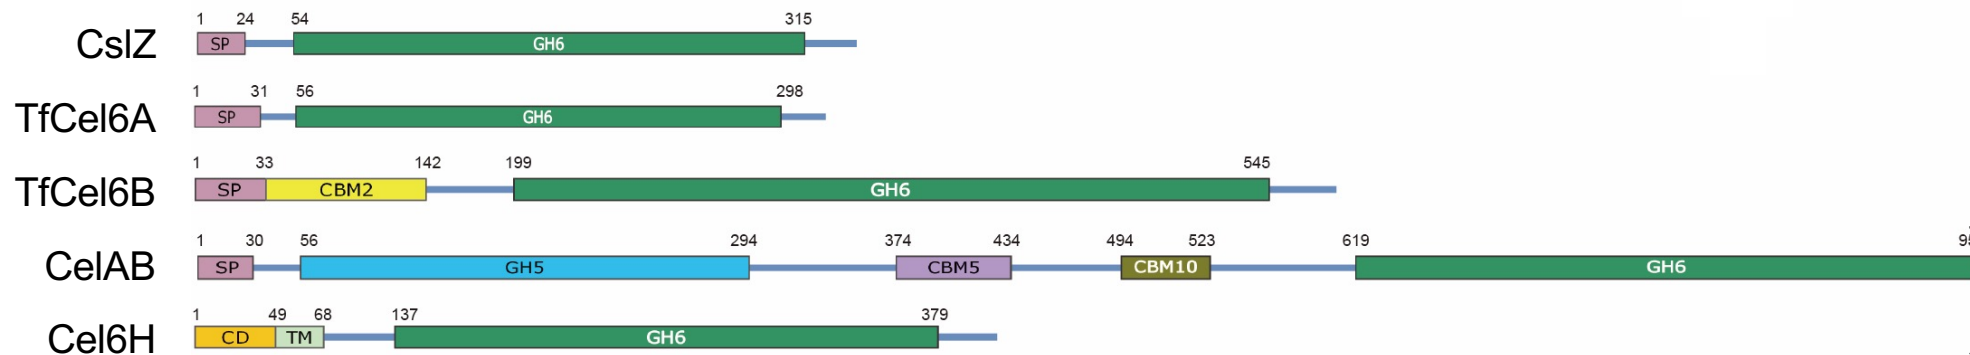

**Supplementary Figure 1. Comparison of CslZ with other GH6 family members.** Schematic overview of hydrolases belonging to the glycoside hydrolase family 6 (GH6). Shown are hydrolases from *Streptomyces coelicolor* (CslZ), *Thermobifida fusca* (TfCel6A, TfCel6B), *Teredinibacter turnerae* (CelAB) and an uncultured bacterium (Cel6H). The signal peptides (SP), GH6 domains, carbohydrate binding modules (CBMs), cytosolic domain (CD) and transmembrane helices (TM) are indicated.

|         |     |                                                                |                                |
|---------|-----|----------------------------------------------------------------|--------------------------------|
| TfCel6B | 199 | -----AAE-----PGGSAVANESTAVWLDRIEGAIEGNSPTTGSMLGRDHLLEEAV       | 243                            |
| CelAB   | 619 | -----AANE-----PGGSAIANEPSFVWMDRIGAIEGPA----                    | DGMGLRDHLNEAL 660              |
| TfCel6A | 056 | -----RTPVIRDRIASVPQGTWFAHNP-----GQIT-GQVDALMSAA                | 092                            |
| CslZ    | 054 | NAAQQVASLADAGKKDQAEIRKIAQQPTGEWISPENP-----EE----               | QARGFTEAA 102                  |
| Cel6H   | 137 | -----AAERATGTERELIDKIASTPQAFWVASTDP-----AVAA-AAVRDYTERA        | 180                            |
|         |     |                                                                | :* . * . .                     |
|         |     |                                                                | ▼                              |
| TfCel6B | 244 | RQSGGDPLTIQVVIYNLPGRDCAALASNGELG--PDELDRYKSEYIDPIADIMWDFADYE   | 301                            |
| CelAB   | 661 | AQGAD---LFMFVVYDLPNRDCAALASNGELRISEDFNIYKSDYIAPIVEIVSD-PAYA    | 716                            |
| TfCel6A | 093 | QAAGK---IPILVVYNAPGRDCGNHSSGGAPSH--SA---YR-SWIDEFAAGLKNRPA--   | 141                            |
| CslZ    | 103 | DEAGR---TALLVLYNIPHRDCGOYSEGGAADG--DA---YR-SFVDGVAKGIGDRAA--   | 151                            |
| Cel6H   | 181 | HTDGT---IGVLVLYAVPGRDCGQHSAGGASE---SA---YA-RWVDAVADAVVG-TP--   | 227                            |
|         |     |                                                                | . *:* * ***. :.* . * :: .. : . |
| TfCel6B | 302 | NLRIVAIIEIDSLPNLVTNVGGNGGTELCAVMKQNGGYVNGVGYAL-RKLGEIPNVYNYI   | 360                            |
| CelAB   | 717 | GIKIAAVIEVDSLPNLVTNLSE----PDCQEANGPGGYRDIRHAI-TELGKVPNVYSYV    | 771                            |
| TfCel6A | 142 | ----YIIVEPDLIS-LMSSCMQHVO-----Q-EVLETMAYAGKALKAGSSQARIYF       | 186                            |
| CslZ    | 152 | ----TVVLEPDAVLHLVDGCTPQEF-----HEERYDLLKGAVA-KLGALKNTKVYL       | 197                            |
| Cel6H   | 228 | ----WVLEPDALP-MLGDCDGQGD-----R---VGYLQYAA--QTLAATGARVYL        | 268                            |
|         |     |                                                                | ::* * : :: . : * . *           |
| TfCel6B | 361 | DAAHHGWIGWDSNFGPSVDIFYEAAANASGSTV-DYVHGFISNTANYSATVEPYLDV-NGT  | 418                            |
| CelAB   | 772 | DIHSGWLGWSDNFAQGVNLIYEVVANLGSIGI-NPIAGFVSNANSANYTPVEEPFLPDSNLQ | 830                            |
| TfCel6A | 187 | DAGHSAWHSPAQMASWLQ-----QADISNSAHGIATNTSNYRWTAEVAYA----         | 232                            |
| CslZ    | 198 | DAGNAGWGHDPQIFDPLK-----RAGVD-QADGFAVNVSNFYTTEDSIAYG----        | 242                            |
| Cel6H   | 269 | DAGHSGWLPAAEEAARRIE-----LVGLD-HLDGFALNVSNYHTTEDSVAYG----       | 313                            |
|         |     |                                                                | * .: .* . : * : * :*: . :      |
| TfCel6B | 419 | VNGQLIRQSKWVDWNQYVDELSEFVQDLRQALIAKGFRSDIGMLIDTSRNGWGGPNRPTGP  | 478                            |
| CelAB   | 831 | VGGQPVRSSDFYEWNSYLAEKPFVTDWRSAMISKMPSSIGMLIDTARNWGGPERPTAQ     | 890                            |
| TfCel6A | 233 | -----KAVLSAIGNPSLRAVIDTSRNGNGPA-----                           | 258                            |
| CslZ    | 243 | -----KQLSAKVGK--PFVIDTSRNGNGPYTE----                           | 268                            |
| Cel6H   | 314 | -----EQVSALLGGA--RYVIDTSRNGNGS-----                            | 336                            |
|         |     |                                                                | . : : :***:*** *               |
| TfCel6B | 479 | SSSTDLNTYVDESRIIDRRIHPGNWCNQAGAGLGERPTVNP-APGVDAYVWVKPPGESDGA  | 537                            |
| CelAB   | 891 | STSNLNTFVDESRIIDRREHRGNWCNQPG-GVGYRPTAAP-APGIDAYVWVKPQGESDGV   | 948                            |
| TfCel6A | 259 | -----GNEWCDPGSGRAIGTPSTTNTGDPMIDAFWIKLPGEADGC                  | 298                            |
| CslZ    | 269 | -----GAPDERWCNPPGRALGETPTTKTADPLVDAYLWVKRPGESDGE               | 311                            |
| Cel6H   | 337 | -----NGEWCNPRGRALGERPRLVDDGTHLDALLWVKLPGESDGT                  | 376                            |
|         |     |                                                                | .** : * .:* :** :*: * **:**    |
| TfCel6B | 538 | SEEIPNDE                                                       | 545                            |
| CelAB   | 949 | SD-----                                                        | 950                            |
| TfCel6A | 298 | -----                                                          | 298                            |
| CslZ    | 312 | CKGG----                                                       | 315                            |
| Cel6H   | 377 | CNG-----                                                       | 379                            |

**Supplementary Figure 2. Sequence alignment of GH6 domains.** Sequence alignment of the GH6 domains of hydrolases from *Streptomyces coelicolor* (CslZ), *Thermobifida fusca* (TfCel6A, TfCel6B), *Teredinibacter turnerae* (CelAB) and an uncultured bacterium (Cel6H). Conserved residues are grey-colored, and the key catalytic residue Asp is labeled with a red arrowhead.

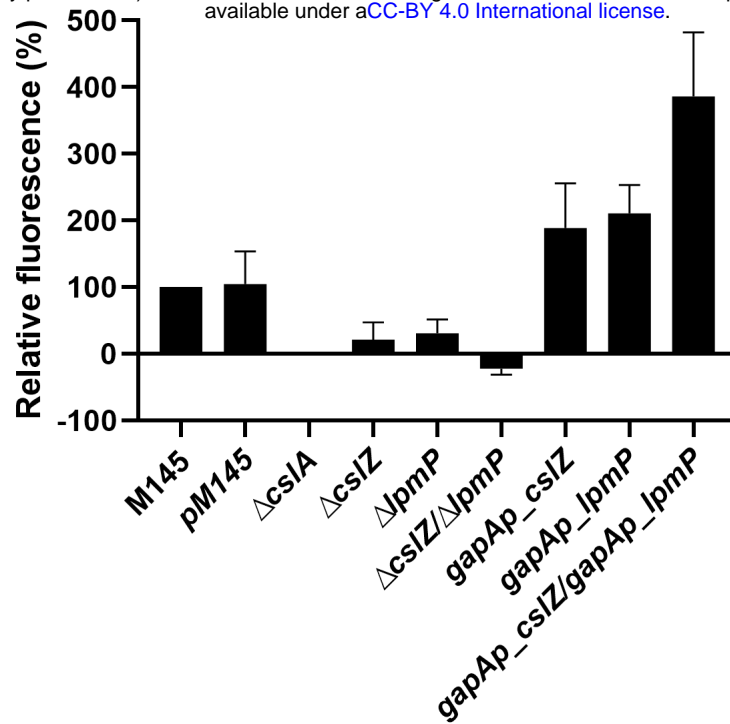

**Supplementary Figure 3. Quantitative analysis of the amount of  $\beta$ -(1,4)-glycans present at hyphal tips of *Streptomyces* strains.** Total fluorescence of calcofluor white-stained tips was determined in square regions of 15  $\mu\text{m}$  x 15  $\mu\text{m}$ . For each strain, 20 tips were measured. The total fluorescence in each strain was corrected for the fluorescence measured in the *csIA* mutant, which does not produce the  $\beta$ -(1,4)-glycan. Fluorescence detected for the wild-type strain was set to 100%. Error bars represent the standard error of the mean.

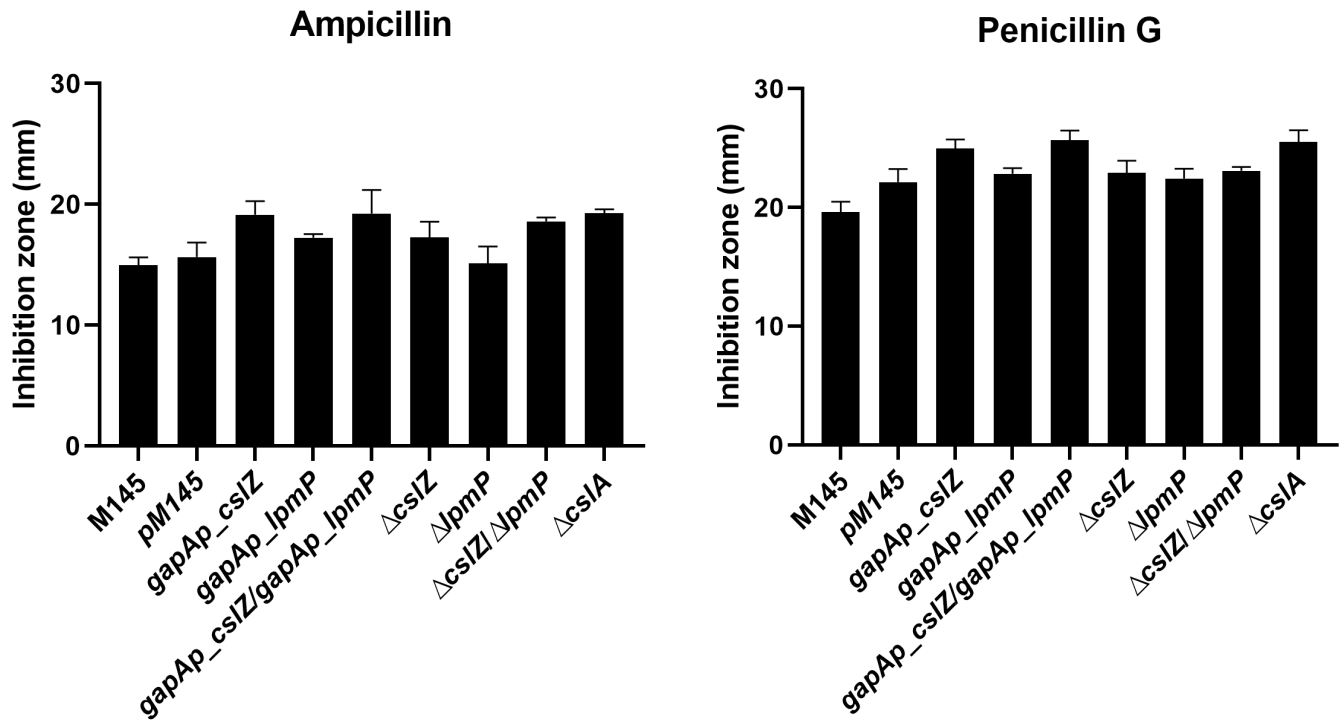

**Supplementary Figure 4. Antibiotic sensitivity of *S. coelicolor* strains lacking genes involved in the biosynthesis pathway of the CslA-produced polymer.** Difco nutrient agar plates (25 ml) were overlaid with 2.5 ml of 0.5% nutrient agar containing  $10^7$  spores of each strain. Whatman discs (6 mm, Sigma) were placed on top of the soft agar, after which 5  $\mu$ l of ampicillin (left) or penicillin-G (right) were applied to the discs. Bars indicate the inhibition zones (in mm) obtained after 48 h growth at 30 °C. Inhibition zones were measured by ImageJ. Error bars indicated standard errors of the mean.

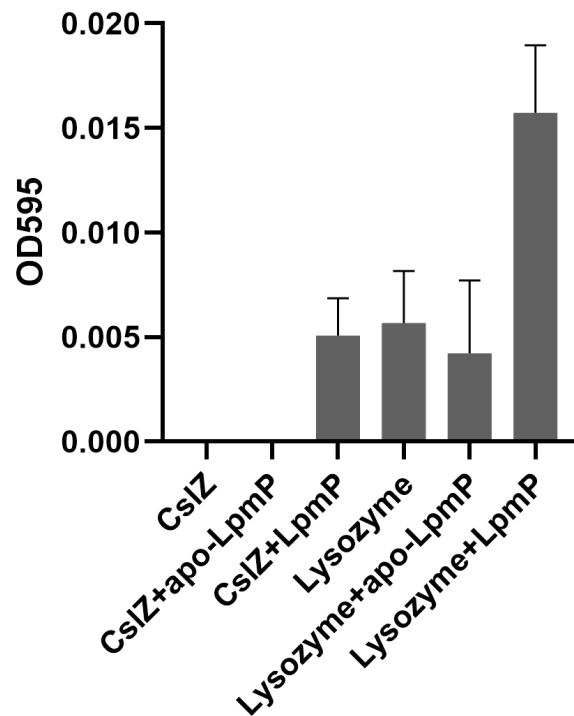

**Supplementary Figure 5. Copper loading is required for the catalytic activity of LpmP on peptidoglycan.** Remazol Brilliant blue (RBB)-labelled peptidoglycan (PG) was incubated with CslZ (5  $\mu$ M), apo-LpmP (1  $\mu$ M), copper-loaded LpmP (1  $\mu$ M), lysozyme (5  $\mu$ M) or combinations thereof. After 3 h at 37°C, undigested RBB-PG was removed by centrifugation, after which the absorbance (OD595) of the supernatant was measured to quantify the release of RBB from PG. Values were blanked against the non-enzyme control. Error bars represent the standard error of triplicate measurements.
